# Supplementary material for: Chemogenomic Analysis of G-Protein Coupled Receptors and Their Ligands Deciphers Locks and Keys Governing Diverse Aspects of Signalling
Source: PubMed Central journal article supplement (PMC3033908; doi:10.1371/journal.pone.0016811), 2011-02-04
Supplement: pone.0016811.s001.pdf [file pone.0016811.s001.pdf]

| Position | Modus      | Mutual Information | Test Statistic S | Molecular Descriptor                                   |
|----------|------------|--------------------|------------------|--------------------------------------------------------|
| 1.31     | Agonist    | 0.3                | 9.91             | ES-Count: sssCH                                        |
| 1.31     | Agonist    | 0.3                | 11.08            | ES-Count: aasC                                         |
| 1.31     | Gi         | 0.24               | 11.16            | Number of H-Acceptors                                  |
| 1.31     | Gi         | 0.24               | 9.14             | C in CH2R2                                             |
| 1.31     | Gi         | 0.24               | 10.17            | ES-Count: aasC                                         |
| 1.31     | Gq         | 0.27               | 8.4              | H attached to C0sp3 with one X attached to next carbon |
| 1.32     | Antagonist | 0.2                | 6.1              | Number of H-Donors                                     |
| 1.32     | Gi         | 0.25               | 14.2             | H attached to heteroatom                               |
| 1.32     | Gi         | 0.27               | 12.2             | Number of Aromatic Rings                               |
| 1.32     | Gi         | 0.29               | 12.94            | ES-Count: sssCH                                        |
| 1.32     | Gq         | 0.27               | 8.61             | Number of Positive Atoms                               |
| 1.32     | Gq         | 0.28               | 7.84             | Molecular Surface Area                                 |
| 1.33     | Gi         | 0.24               | 11.57            | Molecular Weight                                       |
| 1.33     | Gq         | 0.26               | 7.3              | H attached to C0sp3 with no X attached next to C       |
| 1.35     | Gs         | 0.28               | 18.99            | ES-Count: sOH                                          |
| 1.35     | Gs         | 0.29               | 17.78            | Molecular Surface Area                                 |
| 1.35     | Gs         | 0.29               | 6.25             | O in phenol, enol, carboxyl OH                         |
| 1.35     | Gs         | 0.29               | 17.27            | Number of H-Acceptors                                  |
| 1.35     | Gs         | 0.29               | 9.52             | Number of Atoms                                        |
| 1.35     | Gs         | 0.3                | 10.49            | N in Al2NH                                             |
| 1.35     | Gs         | 0.3                | 11.69            | Number of Rings                                        |
| 1.35     | Gs         | 0.32               | 9.4              | H attached to alpha-Cd                                 |
| 1.35     | Gs         | 0.33               | 12.98            | ES-Count: sssCH                                        |
| 1.36     | Agonist    | 0.29               | 15.84            | Number of Bonds                                        |
| 1.36     | Agonist    | 0.31               | 22.56            | Number of Atoms                                        |
| 1.36     | Agonist    | 0.32               | 18.09            | C in CH2R2                                             |
| 1.39     | Agonist    | 0.29               | 13.6             | C in =CHR                                              |
| 1.39     | Agonist    | 0.31               | 18.58            | Number of Hydrogens                                    |
| 1.39     | Agonist    | 0.31               | 26.22            | Number of Rotatable Bonds                              |
| 1.39     | Agonist    | 0.31               | 26.2             | O in alcohol                                           |
| 1.39     | Agonist    | 0.33               | 18.48            | Number of Rings                                        |
| 1.39     | Agonist    | 0.36               | 22.87            | C in CHR2X                                             |
| 1.39     | Agonist    | 0.38               | 19.77            | C in CH2R2                                             |
| 1.39     | Agonist    | 0.39               | 19.95            | C in R--CR--R                                          |
| 1.39     | Antagonist | 0.2                | 7.75             | ES-Count: dssC                                         |
| 1.39     | Antagonist | 0.2                | 9.98             | N in Al3N                                              |
| 1.39     | Antagonist | 0.21               | 12.76            | ES-Count: aasC                                         |
| 1.39     | Gq         | 0.28               | 22.1             | C in CHR3                                              |
| 1.39     | Gq         | 0.34               | 16.69            | C in CH2R2                                             |
| 1.39     | Gq         | 0.34               | 14.58            | C in =CHR                                              |
| 1.39     | Gq         | 0.37               | 19.73            | ES-Count: sssCH                                        |
| 1.39     | Gs         | 0.29               | 11.58            | N in Al3N                                              |
| 1.39     | Gs         | 0.29               | 7.8              | Number of Bonds                                        |
| 1.43     | Agonist    | 0.31               | 16.8             | C in CH2R2                                             |
| 1.43     | Agonist    | 0.32               | 21.64            | Number of Rings                                        |
| 1.43     | Antagonist | 0.21               | 8.68             | ES-Count: dssC                                         |
| 1.43     | Antagonist | 0.22               | 7.92             | N in Al3N                                              |
| 1.43     | Gi         | 0.24               | 27.48            | Number of H-Acceptors                                  |
| 1.43     | Gi         | 0.25               | 15.36            | Molecular Polar Surface Area                           |
| 1.43     | Gi         | 0.26               | 15.52            | ES-Count: ssCH2                                        |
| 1.43     | Gi         | 0.28               | 22.14            | O in phenol, enol, carboxyl OH                         |
| 1.43     | Gq         | 0.27               | 11.9             | Molecular Weight                                       |

| Position | Modus      | Mutual Information | Test Statistic S | Molecular Descriptor                                   |
|----------|------------|--------------------|------------------|--------------------------------------------------------|
| 1.43     | Gq         | 0.28               | 13.1             | Molecular Surface Area                                 |
| 1.43     | Gs         | 0.3                | 28.01            | Number of Rings                                        |
| 1.56     | Gi         | 0.23               | 34.14            | Number of Aromatic Bonds                               |
| 1.57     | Gs         | 0.28               | 18.08            | C in R--CH--R                                          |
| 1.58     | Gq         | 0.26               | 8.04             | Molecular Weight                                       |
| 1.58     | Gq         | 0.28               | 9.83             | Number of Rings                                        |
| 1.58     | Gs         | 0.3                | 9.82             | C in R--CX--X                                          |
| 2.39     | Agonist    | 0.29               | 27.35            | O in alcohol                                           |
| 2.39     | Agonist    | 0.29               | 22.56            | Number of Rings                                        |
| 2.39     | Agonist    | 0.33               | 22.33            | O in phenol, enol, carboxyl OH                         |
| 2.39     | Agonist    | 0.34               | 17.9             | ES-Count: ssCH2                                        |
| 2.39     | Agonist    | 0.35               | 21.18            | C in CHR3                                              |
| 2.39     | Antagonist | 0.21               | 6.48             | ES-Count: dssC                                         |
| 2.39     | Antagonist | 0.22               | 8.88             | Number of H-Donors                                     |
| 2.39     | Gi         | 0.25               | 18.94            | H attached to C1sp3 or C0sp2                           |
| 2.39     | Gi         | 0.27               | 16.18            | ES-Count: sssCH                                        |
| 2.39     | Gq         | 0.28               | 16.62            | O in phenol, enol, carboxyl OH                         |
| 2.39     | Gq         | 0.29               | 12.03            | Number of Bonds                                        |
| 2.39     | Gq         | 0.31               | 11.07            | Number of Atoms                                        |
| 2.39     | Gs         | 0.28               | 16.38            | Molecular Polar Surface Area                           |
| 2.39     | Gs         | 0.28               | 10.95            | H attached to alpha-Cd                                 |
| 2.39     | Gs         | 0.3                | 17.99            | Number of Bonds                                        |
| 2.40     | Agonist    | 0.29               | 15.07            | ES-Count: sssCH                                        |
| 2.40     | Agonist    | 0.31               | 26.35            | Number of Rings                                        |
| 2.40     | Gi         | 0.24               | 10.7             | ES-Count: sssCH                                        |
| 2.40     | Gi         | 0.25               | 14.13            | O in =O                                                |
| 2.44     | Agonist    | 0.3                | 16.66            | Number of Rotatable Bonds                              |
| 2.44     | Agonist    | 0.3                | 14.94            | O in phenol, enol, carboxyl OH                         |
| 2.44     | Gs         | 0.28               | 8.72             | Molecular Surface Area                                 |
| 2.44     | Gs         | 0.3                | 10.04            | Number of H-Acceptors                                  |
| 2.44     | Gs         | 0.31               | 9.04             | Number of Atoms                                        |
| 2.44     | Gs         | 0.32               | 12.25            | Molecular Weight                                       |
| 2.44     | Gs         | 0.32               | 12.42            | Number of Bonds                                        |
| 2.44     | Gs         | 0.32               | 14.52            | H attached to alpha-Cd                                 |
| 2.53     | Agonist    | 0.29               | 20.3             | O in alcohol                                           |
| 2.53     | Agonist    | 0.3                | 16.82            | C in CHR3                                              |
| 2.53     | Agonist    | 0.31               | 22.04            | ES-Count: sssCH                                        |
| 2.53     | Agonist    | 0.32               | 17.61            | Number of H-Acceptors                                  |
| 2.53     | Agonist    | 0.32               | 21.25            | C in R--CR--R                                          |
| 2.53     | Agonist    | 0.34               | 31.83            | Number of Atoms                                        |
| 2.53     | Agonist    | 0.35               | 30.4             | Number of Bonds                                        |
| 2.53     | Antagonist | 0.21               | 16.63            | H attached to C0sp3 with one X attached to next carbon |
| 2.53     | Antagonist | 0.21               | 10.93            | C in CH2R2                                             |
| 2.53     | Antagonist | 0.22               | 9.34             | Molecular Surface Area                                 |
| 2.53     | Antagonist | 0.22               | 12.07            | ES-Count: dssC                                         |
| 2.53     | Antagonist | 0.23               | 9.5              | ES-Count: sssN                                         |
| 2.53     | Gi         | 0.23               | 20.31            | H attached to alpha-Cd                                 |
| 2.53     | Gq         | 0.27               | 20.21            | ES-Count: aasC                                         |
| 2.53     | Gq         | 0.29               | 14.63            | Number of Hydrogens                                    |
| 2.53     | Gq         | 0.3                | 17.89            | Molecular Surface Area                                 |
| 2.53     | Gs         | 0.28               | 18.9             | Number of Rings                                        |
| 2.53     | Gs         | 0.29               | 11.56            | N in Al2NH                                             |
| 2.53     | Gs         | 0.29               | 23.13            | O in phenol, enol, carboxyl OH                         |

| Position | Modus      | Mutual Information | Test Statistic S | Molecular Descriptor                             |
|----------|------------|--------------------|------------------|--------------------------------------------------|
| 2.53     | Gs         | 0.29               | 20.05            | C in CHR3                                        |
| 2.53     | Gs         | 0.29               | 13.53            | ES-Count: aasC                                   |
| 2.53     | Gs         | 0.3                | 14.4             | Molecular Surface Area                           |
| 2.53     | Gs         | 0.32               | 10.78            | Number of Atoms                                  |
| 2.53     | Gs         | 0.34               | 17.62            | Number of H-Acceptors                            |
| 2.54     | Gi         | 0.24               | 15.84            | ES-Count: sOH                                    |
| 2.54     | Gi         | 0.24               | 17.19            | H attached to C0sp3 with no X attached next to C |
| 2.54     | Gi         | 0.25               | 17.99            | H attached to heteroatom                         |
| 2.54     | Gi         | 0.25               | 15.27            | N in RCO-N< or >N-X=X                            |
| 2.54     | Gi         | 0.26               | 14.42            | Number of Ring Bonds                             |
| 2.54     | Gi         | 0.26               | 18.95            | Molecular Polar Surface Area                     |
| 2.54     | Gq         | 0.27               | 14.98            | Number of Hydrogens                              |
| 2.54     | Gq         | 0.28               | 10.77            | ES-Count: dssC                                   |
| 2.54     | Gq         | 0.31               | 11.33            | ES-Count: sssCH                                  |
| 2.54     | Gs         | 0.29               | 14.51            | Number of Rings                                  |
| 2.54     | Gs         | 0.31               | 10.99            | C in CHR3                                        |
| 2.56     | Gi         | 0.23               | 14.67            | ES-Count: ssNH                                   |
| 2.56     | Gi         | 0.23               | 18.97            | Number of H-Acceptors                            |
| 2.56     | Gi         | 0.25               | 19.84            | Number of Rotatable Bonds                        |
| 2.56     | Gi         | 0.25               | 18.37            | H attached to heteroatom                         |
| 2.56     | Gi         | 0.26               | 15.22            | ES-Count: ssCH2                                  |
| 2.56     | Gq         | 0.28               | 13.26            | ES-Count: ssNH                                   |
| 2.56     | Gq         | 0.3                | 10.81            | Number of Rotatable Bonds                        |
| 2.57     | Agonist    | 0.31               | 24.75            | Molecular Weight                                 |
| 2.57     | Agonist    | 0.31               | 21.14            | C in CHR2X                                       |
| 2.57     | Agonist    | 0.38               | 19.98            | C in CH2R2                                       |
| 2.57     | Agonist    | 0.41               | 22.67            | O in phenol, enol, carboxyl OH                   |
| 2.57     | Antagonist | 0.21               | 8.74             | O in phenol, enol, carboxyl OH                   |
| 2.57     | Antagonist | 0.21               | 7.46             | ES-Count: dssC                                   |
| 2.57     | Antagonist | 0.21               | 17.33            | Number of Aromatic Bonds                         |
| 2.57     | Antagonist | 0.23               | 9.65             | H attached to heteroatom                         |
| 2.57     | Antagonist | 0.24               | 9.71             | Number of Rings                                  |
| 2.57     | Antagonist | 0.25               | 14.73            | Number of Bridge Bonds                           |
| 2.57     | Gq         | 0.26               | 18.4             | ES-Count: sssCH                                  |
| 2.57     | Gq         | 0.26               | 17.84            | O in =O                                          |
| 2.57     | Gq         | 0.27               | 22.06            | Molecular Weight                                 |
| 2.57     | Gq         | 0.29               | 14.68            | Molecular Surface Area                           |
| 2.57     | Gq         | 0.3                | 19.74            | Number of Atoms                                  |
| 2.57     | Gq         | 0.36               | 19.56            | Number of Bonds                                  |
| 2.57     | Gq         | 0.37               | 16.33            | ES-Count: dO                                     |
| 2.57     | Gq         | 0.38               | 14.75            | C in CH2R2                                       |
| 2.58     | Agonist    | 0.31               | 25.37            | C in CHR3                                        |
| 2.58     | Antagonist | 0.23               | 22.56            | Number of Rings                                  |
| 2.58     | Gi         | 0.23               | 27.42            | H attached to heteroatom                         |
| 2.58     | Gq         | 0.29               | 23.7             | Molecular Weight                                 |
| 2.58     | Gs         | 0.28               | 14.88            | Number of H-Acceptors                            |
| 2.58     | Gs         | 0.28               | 9.14             | ES-Count: sssCH                                  |
| 2.58     | Gs         | 0.29               | 19.62            | ES-Count: sssN                                   |
| 2.58     | Gs         | 0.29               | 21.6             | O in phenol, enol, carboxyl OH                   |
| 2.58     | Gs         | 0.29               | 18.68            | H attached to alpha-Cd                           |
| 2.60     | Agonist    | 0.3                | 16.96            | Molecular Polar Surface Area                     |
| 2.60     | Agonist    | 0.32               | 17.73            | H attached to C1sp3 or C0sp2                     |
| 2.60     | Gi         | 0.23               | 12.75            | H attached to alpha-Cd                           |

| Position | Modus      | Mutual Information | Test Statistic S | Molecular Descriptor                                   |
|----------|------------|--------------------|------------------|--------------------------------------------------------|
| 2.60     | Gi         | 0.23               | 13.59            | Number of Bridge Bonds                                 |
| 2.60     | Gs         | 0.29               | 10.11            | Number of Rings                                        |
| 2.60     | Gs         | 0.3                | 11.08            | Number of Ring Assemblies                              |
| 2.60     | Gs         | 0.3                | 10.72            | Number of Atoms                                        |
| 2.60     | Gs         | 0.31               | 11.31            | Molecular Weight                                       |
| 2.61     | Agonist    | 0.29               | 18.73            | H attached to C0sp3 with one X attached to next carbon |
| 2.61     | Gi         | 0.23               | 13.03            | Number of H-Acceptors                                  |
| 2.61     | Gi         | 0.27               | 18.11            | Molecular Polar Surface Area                           |
| 2.61     | Gi         | 0.29               | 17.77            | ES-Count: dssC                                         |
| 2.61     | Gq         | 0.26               | 12.5             | Molecular Weight                                       |
| 2.61     | Gq         | 0.29               | 11.58            | Number of Atoms                                        |
| 2.61     | Gq         | 0.3                | 17.78            | Molecular Surface Area                                 |
| 2.63     | Agonist    | 0.28               | 19.1             | Molecular Polar Surface Area                           |
| 2.63     | Agonist    | 0.29               | 10.91            | ES-Count: ssCH2                                        |
| 2.63     | Agonist    | 0.31               | 12.28            | Number of Bonds                                        |
| 2.63     | Gi         | 0.23               | 10.88            | Molecular Weight                                       |
| 2.63     | Gi         | 0.23               | 12.26            | C in CHR2X                                             |
| 2.63     | Gi         | 0.23               | 19.68            | Number of Rotatable Bonds                              |
| 2.63     | Gi         | 0.24               | 11.05            | H attached to alpha-Cd                                 |
| 2.63     | Gi         | 0.24               | 10.87            | Number of Hydrogens                                    |
| 2.63     | Gi         | 0.24               | 11.83            | Molecular Surface Area                                 |
| 2.63     | Gi         | 0.25               | 11.67            | ES-Count: dO                                           |
| 2.63     | Gi         | 0.26               | 13.78            | Number of H-Acceptors                                  |
| 2.63     | Gi         | 0.26               | 12.69            | O in =O                                                |
| 2.63     | Gi         | 0.27               | 10.78            | C in CH2R2                                             |
| 2.63     | Gi         | 0.29               | 11.9             | Molecular Polar Surface Area                           |
| 2.64     | Antagonist | 0.21               | 4.22             | O in =O                                                |
| 2.64     | Antagonist | 0.22               | 7.19             | Number of H-Acceptors                                  |
| 2.64     | Antagonist | 0.22               | 6.39             | N in Al3N                                              |
| 2.64     | Gq         | 0.3                | 10.11            | Number of Rings                                        |
| 2.64     | Gq         | 0.32               | 9.61             | ES-Count: aaaC                                         |
| 2.64     | Gq         | 0.33               | 10.52            | Molecular Surface Area                                 |
| 2.64     | Gs         | 0.29               | 9.62             | H attached to heteroatom                               |
| 2.64     | Gs         | 0.29               | 9.57             | Molecular Polar Surface Area                           |
| 2.64     | Gs         | 0.29               | 10.9             | N in R--N--R or R--N--X                                |
| 2.65     | Agonist    | 0.3                | 23.32            | Molecular Polar Surface Area                           |
| 2.65     | Agonist    | 0.32               | 18.19            | Number of H-Donors                                     |
| 2.65     | Agonist    | 0.33               | 15.83            | O in alcohol                                           |
| 2.65     | Agonist    | 0.37               | 23.03            | ES-Count: aasC                                         |
| 2.65     | Antagonist | 0.2                | 5.13             | Number of Rings                                        |
| 2.65     | Gi         | 0.23               | 15.28            | Number of Aromatic Rings                               |
| 2.65     | Gi         | 0.24               | 13.85            | Molecular Weight                                       |
| 2.65     | Gq         | 0.28               | 9.46             | Molecular Surface Area                                 |
| 2.65     | Gq         | 0.29               | 10.15            | Number of Atoms                                        |
| 2.65     | Gs         | 0.28               | 9.93             | C in CHR3                                              |
| 2.65     | Gs         | 0.32               | 10.57            | Molecular Polar Surface Area                           |
| 2.65     | Gs         | 0.34               | 10.02            | H attached to C0sp3 with one X attached to next carbon |
| 2.66     | Agonist    | 0.29               | 21.33            | H attached to C1sp3 or C0sp2                           |
| 2.67     | Agonist    | 0.28               | 10.06            | Number of Aromatic Rings                               |
| 2.67     | Agonist    | 0.3                | 10.59            | C in CHRX2                                             |
| 2.67     | Agonist    | 0.35               | 21.55            | ES-Count: aaN                                          |
| 2.67     | Antagonist | 0.2                | 6.45             | Molecular Surface Area                                 |

| Position | Modus      | Mutual Information | Test Statistic S | Molecular Descriptor                                   |
|----------|------------|--------------------|------------------|--------------------------------------------------------|
| 2.67     | Antagonist | 0.2                | 6.14             | Number of Aromatic Bonds                               |
| 2.67     | Antagonist | 0.2                | 9.34             | Number of H-Donors                                     |
| 2.67     | Antagonist | 0.21               | 6.39             | ES-Count: dssC                                         |
| 2.67     | Antagonist | 0.21               | 4.18             | ES-Count: aasC                                         |
| 2.67     | Antagonist | 0.22               | 5.32             | C in CH2R2                                             |
| 2.67     | Antagonist | 0.23               | 3.67             | H attached to C0sp3 with one X attached to next carbon |
| 2.67     | Gi         | 0.23               | 8.91             | C in CHR2X                                             |
| 2.67     | Gi         | 0.25               | 9.88             | Molecular Surface Area                                 |
| 2.67     | Gq         | 0.28               | 8.49             | ES-Count: sssCH                                        |
| 2.67     | Gq         | 0.29               | 12.24            | ES-Count: aaN                                          |
| 2.67     | Gq         | 0.29               | 17.49            | Number of Rings                                        |
| 2.67     | Gq         | 0.31               | 8.9              | C in =CHR                                              |
| 2.67     | Gs         | 0.29               | 7.15             | Number of H-Acceptors                                  |
| 2.67     | Gs         | 0.29               | 6.97             | C in CH2R2                                             |
| 2.67     | Gs         | 0.31               | 8.23             | H attached to C1sp3 or C0sp2                           |
| 2.67     | Gs         | 0.31               | 15.31            | C in =CHR                                              |
| 2.67     | Gs         | 0.32               | 13.99            | Number of Rings                                        |
| 2.67     | Gs         | 0.33               | 5.47             | Molecular Polar Surface Area                           |
| 2.67     | Gs         | 0.33               | 6.46             | ES-Count: dsCH                                         |
| 2.67     | Gs         | 0.34               | 10.18            | ES-Count: aaN                                          |
| 2.67     | Gs         | 0.34               | 9.31             | N in R--N--R or R--N--X                                |
| 2.67     | Gs         | 0.35               | 8.58             | Number of Aromatic Rings                               |
| 2.67     | Gs         | 0.38               | 8.52             | C in CH2RX                                             |
| 2.67     | Gs         | 0.4                | 10.24            | ES-Count: aasC                                         |
| 3.26     | Gq         | 0.26               | 14.09            | Molecular Weight                                       |
| 3.26     | Gq         | 0.28               | 18.3             | Number of Ring Bonds                                   |
| 3.26     | Gq         | 0.28               | 14.62            | Molecular Surface Area                                 |
| 3.26     | Gq         | 0.29               | 21.17            | O in phenol, enol, carboxyl OH                         |
| 3.26     | Gq         | 0.3                | 11.68            | C in CH2R2                                             |
| 3.26     | Gq         | 0.3                | 11.24            | O in =O                                                |
| 3.26     | Gq         | 0.34               | 15.61            | ES-Count: dO                                           |
| 3.26     | Gs         | 0.28               | 10.11            | Number of Atoms                                        |
| 3.26     | Gs         | 0.3                | 11.74            | ES-Count: aasC                                         |
| 3.28     | Agonist    | 0.3                | 23.31            | O in alcohol                                           |
| 3.28     | Agonist    | 0.3                | 13.47            | Molecular Surface Area                                 |
| 3.28     | Antagonist | 0.24               | 11.38            | Number of Aromatic Bonds                               |
| 3.28     | Gq         | 0.29               | 23.34            | ES-Count: aaN                                          |
| 3.29     | Agonist    | 0.3                | 15.28            | ES-Count: ssCH2                                        |
| 3.29     | Agonist    | 0.31               | 19.65            | H attached to C0sp3 with no X attached next to C       |
| 3.29     | Agonist    | 0.32               | 19.84            | Number of Bonds                                        |
| 3.29     | Agonist    | 0.33               | 16.88            | H attached to C0sp3 with one X attached to next carbon |
| 3.29     | Agonist    | 0.33               | 16.92            | Molecular Weight                                       |
| 3.29     | Agonist    | 0.35               | 25.09            | Number of Atoms                                        |
| 3.29     | Antagonist | 0.22               | 11.75            | H attached to C1sp3 or C0sp2                           |
| 3.29     | Antagonist | 0.23               | 13.89            | H attached to C0sp3 with no X attached next to C       |
| 3.29     | Gi         | 0.23               | 18.76            | Number of Hydrogens                                    |
| 3.29     | Gi         | 0.24               | 18.22            | ES-Count: ssCH2                                        |
| 3.29     | Gi         | 0.26               | 23.27            | Molecular Surface Area                                 |
| 3.29     | Gq         | 0.26               | 20.74            | Molecular Weight                                       |
| 3.29     | Gq         | 0.26               | 20.08            | Number of Bonds                                        |

| Position | Modus      | Mutual Information | Test Statistic S | Molecular Descriptor                                   |
|----------|------------|--------------------|------------------|--------------------------------------------------------|
| 3.29     | Gq         | 0.27               | 18.72            | ES-Count: dO                                           |
| 3.29     | Gq         | 0.27               | 18.27            | H attached to alpha-Cd                                 |
| 3.29     | Gq         | 0.27               | 14.49            | N in RCO-N< or >N-X=X                                  |
| 3.29     | Gq         | 0.29               | 13.51            | ES-Count: dssC                                         |
| 3.29     | Gq         | 0.29               | 18.09            | H attached to C0sp3 with no X attached next to C       |
| 3.29     | Gq         | 0.29               | 14.9             | O in =O                                                |
| 3.29     | Gq         | 0.29               | 18.09            | Number of Hydrogens                                    |
| 3.29     | Gq         | 0.31               | 14.24            | C in CH2R2                                             |
| 3.30     | Gq         | 0.26               | 12.35            | ES-Count: dsCH                                         |
| 3.30     | Gq         | 0.27               | 10.34            | O in phenol, enol, carboxyl OH                         |
| 3.30     | Gs         | 0.28               | 11.39            | C in CHR3                                              |
| 3.30     | Gs         | 0.3                | 11.08            | N in Al3N                                              |
| 3.30     | Gs         | 0.32               | 25.97            | O in phenol, enol, carboxyl OH                         |
| 3.30     | Gs         | 0.32               | 18.1             | ES-Count: sssN                                         |
| 3.30     | Gs         | 0.33               | 16.34            | ES-Count: sssCH                                        |
| 3.30     | Gs         | 0.34               | 11.47            | N in R--N--R or R--N--X                                |
| 3.30     | Gs         | 0.34               | 14.24            | Number of H-Acceptors                                  |
| 3.32     | Agonist    | 0.29               | 20.25            | N in R--N--R or R--N--X                                |
| 3.32     | Agonist    | 0.31               | 29.42            | ES-Count: dsCH                                         |
| 3.32     | Antagonist | 0.2                | 21.42            | C in R--CH--R                                          |
| 3.32     | Antagonist | 0.2                | 10.75            | C in R-C(=X)-X or X=C=X                                |
| 3.32     | Antagonist | 0.22               | 24.01            | ES-Count: aaCH                                         |
| 3.32     | Antagonist | 0.24               | 18.43            | Number of Aromatic Bonds                               |
| 3.32     | Gq         | 0.26               | 18.45            | ES-Count: ssCH2                                        |
| 3.32     | Gq         | 0.26               | 20.91            | C in CH2R2                                             |
| 3.32     | Gs         | 0.29               | 9.87             | Number of Bonds                                        |
| 3.32     | Gs         | 0.29               | 10.44            | Number of Aromatic Bonds                               |
| 3.32     | Gs         | 0.29               | 13.32            | H attached to alpha-Cd                                 |
| 3.32     | Gs         | 0.29               | 16.47            | Number of Hydrogens                                    |
| 3.32     | Gs         | 0.29               | 10.13            | C in =CHR                                              |
| 3.32     | Gs         | 0.3                | 15.26            | ES-Count: dsCH                                         |
| 3.32     | Gs         | 0.31               | 13.62            | O in alcohol                                           |
| 3.32     | Gs         | 0.34               | 16.16            | C in CHR2X                                             |
| 3.33     | Agonist    | 0.31               | 14.57            | Number of Aromatic Rings                               |
| 3.33     | Agonist    | 0.31               | 16.22            | C in CHR2X                                             |
| 3.33     | Gs         | 0.29               | 12.4             | ES-Count: dssC                                         |
| 3.33     | Gs         | 0.34               | 12.11            | H attached to C0sp3 with one X attached to next carbon |
| 3.33     | Gs         | 0.35               | 13.39            | H attached to heteroatom                               |
| 3.34     | Gs         | 0.28               | 19.84            | ES-Count: sOH                                          |
| 3.34     | Gs         | 0.28               | 19.79            | ES-Count: aasC                                         |
| 3.34     | Gs         | 0.28               | 12.35            | Number of H-Acceptors                                  |
| 3.34     | Gs         | 0.29               | 15.46            | Molecular Surface Area                                 |
| 3.34     | Gs         | 0.29               | 21.75            | O in alcohol                                           |
| 3.34     | Gs         | 0.32               | 10.74            | Number of Atoms                                        |
| 3.34     | Gs         | 0.32               | 13.32            | Molecular Weight                                       |
| 3.34     | Gs         | 0.33               | 15.17            | Number of Rings                                        |
| 3.34     | Gs         | 0.33               | 13.32            | C in CHR3                                              |
| 3.35     | Agonist    | 0.34               | 22.47            | Number of Rotatable Bonds                              |
| 3.35     | Agonist    | 0.35               | 23.46            | O in phenol, enol, carboxyl OH                         |
| 3.35     | Antagonist | 0.21               | 12.46            | Number of H-Donors                                     |
| 3.35     | Antagonist | 0.24               | 12.09            | H attached to C0sp3 with one X attached to next carbon |

| Position | Modus      | Mutual Information | Test Statistic S | Molecular Descriptor                             |
|----------|------------|--------------------|------------------|--------------------------------------------------|
| 3.35     | Antagonist | 0.24               | 12.6             | ES-Count: sOH                                    |
| 3.35     | Gi         | 0.23               | 15.44            | ES-Count: dO                                     |
| 3.35     | Gi         | 0.27               | 18.37            | H attached to heteroatom                         |
| 3.36     | Agonist    | 0.29               | 26.94            | ES-Count: sssCH                                  |
| 3.36     | Agonist    | 0.29               | 30.03            | Number of Aromatic Bonds                         |
| 3.36     | Agonist    | 0.3                | 29.11            | Number of Ring Bonds                             |
| 3.36     | Agonist    | 0.3                | 14.2             | Number of H-Donors                               |
| 3.36     | Agonist    | 0.31               | 25.1             | H attached to heteroatom                         |
| 3.36     | Agonist    | 0.31               | 24.11            | Number of Rotatable Bonds                        |
| 3.36     | Agonist    | 0.32               | 19.89            | Number of Hydrogens                              |
| 3.36     | Agonist    | 0.33               | 22.18            | H attached to C0sp3 with no X attached next to C |
| 3.36     | Agonist    | 0.33               | 16.84            | C in CHR2X                                       |
| 3.36     | Agonist    | 0.35               | 24.96            | O in alcohol                                     |
| 3.36     | Agonist    | 0.35               | 27.55            | Number of Aromatic Rings                         |
| 3.36     | Agonist    | 0.36               | 24.23            | Molecular Weight                                 |
| 3.36     | Agonist    | 0.41               | 32.22            | C in CH2R2                                       |
| 3.36     | Agonist    | 0.43               | 24.52            | Number of Atoms                                  |
| 3.36     | Agonist    | 0.45               | 22.73            | O in phenol, enol, carboxyl OH                   |
| 3.36     | Agonist    | 0.45               | 22.5             | Number of Bonds                                  |
| 3.36     | Antagonist | 0.2                | 11.22            | Number of H-Acceptors                            |
| 3.36     | Antagonist | 0.2                | 13.28            | Number of Hydrogens                              |
| 3.36     | Antagonist | 0.2                | 11.53            | Molecular Weight                                 |
| 3.36     | Antagonist | 0.2                | 11.87            | Number of Ring Bonds                             |
| 3.36     | Antagonist | 0.21               | 9.64             | Number of Bonds                                  |
| 3.36     | Antagonist | 0.21               | 18.19            | Molecular Surface Area                           |
| 3.36     | Antagonist | 0.22               | 11.95            | Number of Atoms                                  |
| 3.36     | Antagonist | 0.23               | 28.2             | H attached to C1sp3 or C0sp2                     |
| 3.36     | Antagonist | 0.24               | 19.08            | ES-Count: dssC                                   |
| 3.36     | Antagonist | 0.24               | 12.11            | Number of Aromatic Bonds                         |
| 3.36     | Antagonist | 0.24               | 20.59            | O in phenol, enol, carboxyl OH                   |
| 3.36     | Antagonist | 0.25               | 15               | H attached to C0sp3 with no X attached next to C |
| 3.36     | Gi         | 0.26               | 14.67            | ES-Count: sssCH                                  |
| 3.36     | Gi         | 0.27               | 15.2             | Number of Rotatable Bonds                        |
| 3.36     | Gi         | 0.27               | 18.09            | Number of Hydrogens                              |
| 3.36     | Gi         | 0.28               | 16.27            | Number of Bonds                                  |
| 3.36     | Gi         | 0.28               | 18.38            | Number of H-Donors                               |
| 3.36     | Gi         | 0.28               | 12.86            | ES-Count: aaCH                                   |
| 3.36     | Gi         | 0.29               | 20.15            | ES-Count: sOH                                    |
| 3.36     | Gi         | 0.29               | 19.48            | Number of Atoms                                  |
| 3.36     | Gi         | 0.3                | 18.92            | C in CHR2X                                       |
| 3.36     | Gi         | 0.3                | 17.54            | C in R--CH--R                                    |
| 3.36     | Gi         | 0.3                | 17.63            | Number of H-Acceptors                            |
| 3.36     | Gi         | 0.31               | 14.27            | Molecular Surface Area                           |
| 3.36     | Gi         | 0.31               | 25.5             | Molecular Weight                                 |
| 3.36     | Gi         | 0.31               | 20.72            | Molecular Polar Surface Area                     |
| 3.36     | Gi         | 0.31               | 27.54            | Number of Ring Bonds                             |
| 3.36     | Gi         | 0.31               | 16.16            | ES-Count: ssCH2                                  |
| 3.36     | Gi         | 0.32               | 21.51            | H attached to heteroatom                         |
| 3.36     | Gi         | 0.32               | 18.78            | H attached to alpha-Cd                           |
| 3.36     | Gi         | 0.33               | 22.86            | Number of Aromatic Bonds                         |
| 3.36     | Gi         | 0.33               | 20.42            | C in CH2R2                                       |

| Position | Modus      | Mutual Information | Test Statistic S | Molecular Descriptor                                   |
|----------|------------|--------------------|------------------|--------------------------------------------------------|
| 3.36     | Gi         | 0.35               | 24               | H attached to C0sp3 with no X attached next to C       |
| 3.36     | Gq         | 0.27               | 17.5             | C in =CHR                                              |
| 3.36     | Gq         | 0.27               | 16.33            | N in Al3N                                              |
| 3.36     | Gq         | 0.27               | 23.7             | ES-Count: sssCH                                        |
| 3.36     | Gq         | 0.28               | 14.77            | C in CH2R2                                             |
| 3.36     | Gq         | 0.33               | 19.78            | ES-Count: dsCH                                         |
| 3.36     | Gq         | 0.35               | 14.68            | C in CH2RX                                             |
| 3.36     | Gq         | 0.37               | 15.58            | Number of Atoms                                        |
| 3.36     | Gq         | 0.37               | 28.15            | Molecular Weight                                       |
| 3.36     | Gs         | 0.3                | 17.78            | Molecular Polar Surface Area                           |
| 3.36     | Gs         | 0.3                | 20.71            | ES-Count: dsCH                                         |
| 3.36     | Gs         | 0.31               | 14.66            | ES-Count: aasC                                         |
| 3.36     | Gs         | 0.33               | 14.43            | N in Al3N                                              |
| 3.36     | Gs         | 0.36               | 14.52            | ES-Count: aaN                                          |
| 3.36     | Gs         | 0.37               | 12.71            | Number of H-Donors                                     |
| 3.36     | Gs         | 0.39               | 20.27            | N in R--N--R or R--N--X                                |
| 3.37     | Agonist    | 0.29               | 24.21            | Molecular Polar Surface Area                           |
| 3.37     | Agonist    | 0.29               | 29.54            | C in R--CR--R                                          |
| 3.37     | Agonist    | 0.29               | 21.97            | Number of Aromatic Rings                               |
| 3.37     | Agonist    | 0.31               | 26.1             | Number of Ring Bonds                                   |
| 3.37     | Agonist    | 0.32               | 26.62            | H attached to C0sp3 with no X attached next to C       |
| 3.37     | Agonist    | 0.33               | 34.79            | C in CH2R2                                             |
| 3.37     | Agonist    | 0.37               | 31.37            | H attached to heteroatom                               |
| 3.37     | Agonist    | 0.38               | 24.81            | Number of H-Donors                                     |
| 3.37     | Agonist    | 0.39               | 24.39            | ES-Count: dsCH                                         |
| 3.37     | Agonist    | 0.42               | 21.72            | O in phenol, enol, carboxyl OH                         |
| 3.37     | Agonist    | 0.44               | 37.02            | C in =CHR                                              |
| 3.37     | Agonist    | 0.45               | 25.68            | ES-Count: aasC                                         |
| 3.37     | Antagonist | 0.21               | 10.73            | Molecular Weight                                       |
| 3.37     | Antagonist | 0.22               | 11.62            | Number of Ring Bonds                                   |
| 3.37     | Antagonist | 0.22               | 11.56            | ES-Count: sOH                                          |
| 3.37     | Antagonist | 0.22               | 11.83            | Number of Bonds                                        |
| 3.37     | Antagonist | 0.22               | 9.97             | H attached to C0sp3 with no X attached next to C       |
| 3.37     | Antagonist | 0.22               | 11.09            | Number of Rotatable Bonds                              |
| 3.37     | Antagonist | 0.23               | 12.44            | C in CH2R2                                             |
| 3.37     | Antagonist | 0.23               | 11.47            | Molecular Surface Area                                 |
| 3.37     | Antagonist | 0.23               | 17.53            | Number of H-Acceptors                                  |
| 3.37     | Antagonist | 0.23               | 11.14            | Number of Atoms                                        |
| 3.37     | Antagonist | 0.23               | 12.12            | H attached to C1sp3 or C0sp2                           |
| 3.37     | Antagonist | 0.25               | 11.31            | ES-Count: dssC                                         |
| 3.37     | Antagonist | 0.25               | 14.7             | H attached to C0sp3 with one X attached to next carbon |
| 3.37     | Antagonist | 0.28               | 14.69            | Number of Aromatic Bonds                               |
| 3.37     | Antagonist | 0.3                | 14.08            | Number of Rings                                        |
| 3.37     | Antagonist | 0.3                | 11.31            | Number of H-Donors                                     |
| 3.37     | Gi         | 0.24               | 26.52            | Molecular Surface Area                                 |
| 3.37     | Gi         | 0.24               | 21.37            | H attached to C0sp3 with no X attached next to C       |
| 3.37     | Gi         | 0.24               | 16.27            | ES-Count: dO                                           |
| 3.37     | Gi         | 0.25               | 20.95            | Number of Ring Bonds                                   |
| 3.37     | Gq         | 0.28               | 16.76            | C in R--CR--R                                          |



| Position | Modus      | Mutual Information | Test Statistic S | Molecular Descriptor                    |
|----------|------------|--------------------|------------------|-----------------------------------------|
| 3.37     | Gq         | 0.31               | 23               | Number of Rings                         |
| 3.37     | Gq         | 0.35               | 20.42            | C in CHR2X                              |
| 3.37     | Gq         | 0.35               | 15.25            | ES-Count: aaN                           |
| 3.37     | Gq         | 0.36               | 19.02            | Number of Bonds                         |
| 3.37     | Gs         | 0.28               | 13.52            | ES-Count: aasC                          |
| 3.37     | Gs         | 0.28               | 13.14            | Number of Hydrogens                     |
| 3.37     | Gs         | 0.29               | 20.36            | Number of Atoms                         |
| 3.38     | Gq         | 0.31               | 25.98            | Molecular Weight                        |
| 3.40     | Agonist    | 0.29               | 24.74            | Number of Rings                         |
| 3.42     | Agonist    | 0.29               | 23.08            | Number of Aromatic Rings                |
| 3.42     | Agonist    | 0.29               | 17.69            | O in phenol, enol, carboxyl OH          |
| 3.42     | Agonist    | 0.3                | 33.81            | ES-Count: dsCH                          |
| 3.42     | Agonist    | 0.31               | 23.04            | ES-Count: ssCH2                         |
| 3.42     | Agonist    | 0.33               | 24.06            | Number of Ring Bonds                    |
| 3.42     | Agonist    | 0.35               | 21.87            | ES-Count: aasC                          |
| 3.42     | Agonist    | 0.36               | 20.6             | Molecular Polar Surface Area            |
| 3.42     | Agonist    | 0.37               | 19.99            | C in R--CR--R                           |
| 3.42     | Agonist    | 0.47               | 42.75            | Number of H-Donors                      |
| 3.42     | Antagonist | 0.21               | 13.92            | ES-Count: dssC                          |
| 3.42     | Gi         | 0.24               | 15.61            | ES-Count: sssCH                         |
| 3.42     | Gi         | 0.24               | 16.64            | H attached to alpha-Cd                  |
| 3.42     | Gi         | 0.24               | 16.58            | ES-Count: dO                            |
|          |            |                    |                  | H attached to C0sp3 with one X attached |
| 3.42     | Gi         | 0.24               | 16.17            | to next carbon                          |
| 3.42     | Gi         | 0.24               | 20.86            | C in R-C(=X)-X or X=C=X                 |
| 3.42     | Gi         | 0.25               | 17.86            | H attached to heteroatom                |
| 3.42     | Gi         | 0.25               | 18.88            | ES-Count: dssC                          |
| 3.42     | Gq         | 0.26               | 13.02            | ES-Count: sssCH                         |
| 3.42     | Gq         | 0.27               | 14.38            | ES-Count: dsCH                          |
| 3.42     | Gq         | 0.29               | 11.85            | Molecular Surface Area                  |
| 3.42     | Gq         | 0.3                | 24.33            | Molecular Weight                        |
| 3.44     | Agonist    | 0.29               | 19.18            | H attached to C1sp3 or C0sp2            |
| 3.44     | Agonist    | 0.33               | 20.66            | Number of Aromatic Rings                |
| 3.44     | Antagonist | 0.2                | 7.09             | Number of Rings                         |
| 3.44     | Antagonist | 0.23               | 13.39            | ES-Count: sOH                           |
| 3.44     | Antagonist | 0.23               | 9.51             | H attached to heteroatom                |
| 3.44     | Antagonist | 0.25               | 10.68            | ES-Count: sssCH                         |
| 3.44     | Gi         | 0.24               | 16.38            | C in CHR2X                              |
|          |            |                    |                  | H attached to C0sp3 with one X attached |
| 3.44     | Gi         | 0.28               | 18.16            | to next carbon                          |
| 3.44     | Gq         | 0.31               | 14.02            | Number of Aromatic Rings                |
| 3.44     | Gq         | 0.33               | 15.01            | C in R-C(=X)-X or X=C=X                 |
| 3.44     | Gs         | 0.3                | 11.67            | H attached to heteroatom                |
| 3.44     | Gs         | 0.33               | 13.28            | Number of H-Donors                      |
| 3.46     | Gs         | 0.29               | 27.55            | H attached to alpha-Cd                  |
| 3.52     | Agonist    | 0.29               | 16.01            | Molecular Weight                        |
| 3.52     | Antagonist | 0.2                | 6.98             | C in CH2R2                              |
| 3.52     | Antagonist | 0.22               | 9.13             | ES-Count: sssN                          |
| 3.55     | Gs         | 0.29               | 13.33            | Number of Rings                         |
| 3.55     | Gs         | 0.3                | 10.5             | ES-Count: sOH                           |
| 3.55     | Gs         | 0.31               | 9.27             | H attached to alpha-Cd                  |
| 3.55     | Gs         | 0.32               | 13.74            | C in =CHR                               |
| 3.55     | Gs         | 0.32               | 9.39             | H attached to heteroatom                |
| 3.55     | Gs         | 0.32               | 8.52             | ES-Count: dsCH                          |

| Position | Modus      | Mutual Information | Test Statistic S | Molecular Descriptor                                   |
|----------|------------|--------------------|------------------|--------------------------------------------------------|
| 4.41     | Gq         | 0.26               | 9.85             | C in R-C(=X)-X or X=C=X                                |
| 4.41     | Gq         | 0.29               | 11.39            | H attached to C0sp3 with one X attached to next carbon |
| 4.43     | Gq         | 0.26               | 12.01            | Molecular Surface Area                                 |
| 4.43     | Gq         | 0.29               | 8.97             | C in CHR2X                                             |
| 4.43     | Gq         | 0.3                | 11.94            | Molecular Weight                                       |
| 4.46     | Agonist    | 0.29               | 24.38            | Number of Rotatable Bonds                              |
| 4.46     | Agonist    | 0.29               | 16.59            | O in alcohol                                           |
| 4.46     | Antagonist | 0.25               | 27.99            | C in CH2R2                                             |
| 4.46     | Gi         | 0.23               | 16.67            | Number of H-Donors                                     |
| 4.46     | Gi         | 0.24               | 16.41            | H attached to C0sp3 with one X attached to next carbon |
| 4.46     | Gi         | 0.24               | 16.26            | Number of Rotatable Bonds                              |
| 4.46     | Gi         | 0.25               | 18.95            | H attached to heteroatom                               |
| 4.46     | Gi         | 0.25               | 18.83            | C in CH2R2                                             |
| 4.47     | Gs         | 0.28               | 13.24            | ES-Count: sOH                                          |
| 4.47     | Gs         | 0.28               | 8.72             | C in CH2RX                                             |
| 4.57     | Agonist    | 0.3                | 20.83            | Molecular Weight                                       |
| 4.57     | Agonist    | 0.37               | 19.04            | Molecular Polar Surface Area                           |
| 4.57     | Agonist    | 0.39               | 23.43            | H attached to heteroatom                               |
| 4.57     | Antagonist | 0.21               | 7.33             | Number of Rings                                        |
| 4.57     | Antagonist | 0.22               | 9.07             | Molecular Surface Area                                 |
| 4.57     | Antagonist | 0.24               | 10.57            | Number of H-Donors                                     |
| 4.57     | Gi         | 0.25               | 20.2             | C in CHR2X                                             |
| 4.57     | Gi         | 0.29               | 20.87            | ES-Count: sOH                                          |
| 4.57     | Gi         | 0.3                | 18.8             | C in R-C(=X)-X or X=C=X                                |
| 4.57     | Gi         | 0.31               | 19.56            | C in CH2R2                                             |
| 4.57     | Gq         | 0.28               | 14.97            | Number of Rings                                        |
| 4.57     | Gq         | 0.33               | 15.69            | ES-Count: dO                                           |
| 4.57     | Gq         | 0.33               | 12.49            | C in CHR2X                                             |
| 4.57     | Gs         | 0.29               | 10.03            | C in CHR3                                              |
| 4.57     | Gs         | 0.3                | 14.76            | ES-Count: aasC                                         |
| 4.57     | Gs         | 0.3                | 14.85            | C in CH2RX                                             |
| 4.57     | Gs         | 0.31               | 15.64            | Number of Rings                                        |
| 4.58     | Gs         | 0.28               | 10.88            | Number of H-Acceptors                                  |
| 4.58     | Gs         | 0.28               | 12.78            | ES-Count: aasC                                         |
| 4.58     | Gs         | 0.29               | 11.01            | ES-Count: dssC                                         |
| 4.58     | Gs         | 0.29               | 10.09            | ES-Count: dO                                           |
| 4.58     | Gs         | 0.3                | 11.31            | Molecular Polar Surface Area                           |
| 4.60     | Antagonist | 0.21               | 9.77             | Molecular Weight                                       |
| 4.60     | Antagonist | 0.21               | 10.37            | Number of Ring Bonds                                   |
| 4.60     | Antagonist | 0.22               | 11.12            | Number of H-Donors                                     |
| 4.60     | Antagonist | 0.22               | 10.36            | C in CH2R2                                             |
| 4.60     | Antagonist | 0.22               | 9.39             | H attached to C0sp3 with no X attached next to C       |
| 4.60     | Antagonist | 0.23               | 9.19             | ES-Count: aasC                                         |
| 4.60     | Antagonist | 0.23               | 6.85             | ES-Count: dssC                                         |
| 4.60     | Antagonist | 0.23               | 8.07             | ES-Count: ssNH                                         |
| 4.60     | Antagonist | 0.23               | 8.15             | H attached to heteroatom                               |
| 4.60     | Antagonist | 0.25               | 11.39            | ES-Count: dO                                           |
| 4.60     | Antagonist | 0.26               | 12.68            | H attached to C0sp3 with one X attached to next carbon |
| 4.60     | Gi         | 0.24               | 16.72            | C in R-C(=X)-X or X=C=X                                |

| Position | Modus      | Mutual Information | Test Statistic S | Molecular Descriptor                                   |
|----------|------------|--------------------|------------------|--------------------------------------------------------|
| 4.60     | Gi         | 0.24               | 16.91            | H attached to C0sp3 with one X attached to next carbon |
| 4.60     | Gq         | 0.27               | 12.02            | Number of Atoms                                        |
| 4.60     | Gq         | 0.28               | 13.94            | ES-Count: aasC                                         |
| 4.60     | Gq         | 0.3                | 8.61             | Number of Hydrogens                                    |
| 4.60     | Gq         | 0.3                | 10.06            | C in R-C(=X)-X or X=C=X                                |
| 5.35     | Agonist    | 0.34               | 15.56            | C in R--CR--R                                          |
| 5.35     | Agonist    | 0.34               | 16.19            | ES-Count: aaN                                          |
| 5.35     | Agonist    | 0.36               | 11.47            | O in phenol, enol, carboxyl OH                         |
| 5.35     | Agonist    | 0.36               | 13.62            | N in R--N--R or R--N--X                                |
| 5.35     | Agonist    | 0.37               | 23.8             | Number of Hydrogens                                    |
| 5.35     | Agonist    | 0.37               | 12.96            | C in CH2R2                                             |
| 5.35     | Antagonist | 0.2                | 6.17             | Number of H-Acceptors                                  |
| 5.35     | Antagonist | 0.2                | 7.44             | H attached to C1sp3 or C0sp2                           |
| 5.35     | Antagonist | 0.2                | 7.19             | H attached to C0sp3 with no X attached next to C       |
| 5.35     | Antagonist | 0.21               | 7.44             | Number of Atoms                                        |
| 5.35     | Antagonist | 0.21               | 5.72             | Number of Bonds                                        |
| 5.35     | Antagonist | 0.21               | 6.1              | Number of H-Donors                                     |
| 5.35     | Antagonist | 0.22               | 7.75             | H attached to C0sp3 with one X attached to next carbon |
| 5.35     | Antagonist | 0.22               | 8.57             | ES-Count: sssN                                         |
| 5.35     | Antagonist | 0.23               | 5.61             | N in Al3N                                              |
| 5.35     | Antagonist | 0.23               | 4.62             | ES-Count: dssC                                         |
| 5.35     | Antagonist | 0.24               | 8.58             | H attached to heteroatom                               |
| 5.35     | Gi         | 0.23               | 10.77            | Number of Atoms                                        |
| 5.35     | Gi         | 0.23               | 9.19             | Number of Bonds                                        |
| 5.35     | Gi         | 0.23               | 7.94             | Molecular Surface Area                                 |
| 5.35     | Gi         | 0.24               | 10.6             | Molecular Weight                                       |
| 5.35     | Gi         | 0.24               | 11.29            | H attached to C0sp3 with no X attached next to C       |
| 5.35     | Gi         | 0.25               | 11.23            | Number of H-Acceptors                                  |
| 5.35     | Gi         | 0.25               | 11.18            | Number of H-Donors                                     |
| 5.35     | Gi         | 0.25               | 7.85             | Molecular Polar Surface Area                           |
| 5.35     | Gi         | 0.26               | 13.47            | H attached to alpha-Cd                                 |
| 5.35     | Gi         | 0.27               | 11.82            | ES-Count: sssCH                                        |
| 5.35     | Gi         | 0.28               | 10.28            | ES-Count: aasC                                         |
| 5.35     | Gi         | 0.29               | 15.47            | H attached to heteroatom                               |
| 5.35     | Gi         | 0.3                | 15.68            | C in CH2R2                                             |
| 5.35     | Gi         | 0.3                | 11.58            | Number of Aromatic Rings                               |
| 5.35     | Gq         | 0.28               | 8.19             | N in R--N--R or R--N--X                                |
| 5.35     | Gq         | 0.3                | 14.42            | O in =O                                                |
| 5.35     | Gs         | 0.28               | 9.5              | Number of Rings                                        |
| 5.35     | Gs         | 0.28               | 11.22            | Number of Bonds                                        |
| 5.35     | Gs         | 0.29               | 10.09            | Number of Hydrogens                                    |
| 5.35     | Gs         | 0.29               | 8.62             | Molecular Surface Area                                 |
| 5.35     | Gs         | 0.3                | 10.08            | Number of H-Donors                                     |
| 5.35     | Gs         | 0.32               | 7.86             | H attached to heteroatom                               |
| 5.36     | Antagonist | 0.21               | 2.71             | Number of H-Acceptors                                  |
| 5.36     | Antagonist | 0.21               | 4.17             | ES-Count: sOH                                          |
| 5.36     | Gi         | 0.23               | 8.92             | Molecular Weight                                       |
| 5.36     | Gi         | 0.23               | 10.57            | C in CHR2X                                             |
| 5.36     | Gi         | 0.23               | 9.11             | Number of H-Acceptors                                  |
| 5.36     | Gi         | 0.25               | 11.99            | ES-Count: sssCH                                        |

| Position | Modus      | Mutual Information | Test Statistic S | Molecular Descriptor                                   |
|----------|------------|--------------------|------------------|--------------------------------------------------------|
| 5.36     | Gi         | 0.26               | 8.67             | H attached to C0sp3 with no X attached next to C       |
| 5.36     | Gi         | 0.27               | 9.64             | ES-Count: aasC                                         |
| 5.36     | Gq         | 0.26               | 15.03            | Number of Bonds                                        |
| 5.36     | Gq         | 0.27               | 8.22             | O in phenol, enol, carboxyl OH                         |
| 5.36     | Gq         | 0.28               | 6.46             | O in =O                                                |
| 5.36     | Gq         | 0.31               | 12.08            | ES-Count: dO                                           |
| 5.36     | Gq         | 0.31               | 16.2             | Number of Hydrogens                                    |
| 5.36     | Gq         | 0.31               | 7.84             | C in CH2R2                                             |
| 5.36     | Gs         | 0.28               | 7.66             | C in CH2R2                                             |
| 5.36     | Gs         | 0.31               | 6.62             | Molecular Weight                                       |
| 5.36     | Gs         | 0.33               | 6.84             | ES-Count: dssC                                         |
| 5.37     | Agonist    | 0.33               | 12.5             | C in X--CH...X                                         |
| 5.37     | Agonist    | 0.33               | 14               | Number of Rotatable Bonds                              |
| 5.37     | Gq         | 0.27               | 14.36            | ES-Count: aaN                                          |
| 5.37     | Gq         | 0.33               | 11.58            | H attached to C1sp3 or C0sp2                           |
| 5.37     | Gq         | 0.33               | 9.37             | Number of Rotatable Bonds                              |
| 5.37     | Gq         | 0.36               | 9.24             | N in Ar2NH, Ar3N, Ar2N-Al or R...N...R                 |
| 5.37     | Gs         | 0.28               | 8.61             | Number of Atoms                                        |
| 5.37     | Gs         | 0.29               | 7.31             | Molecular Surface Area                                 |
| 5.37     | Gs         | 0.34               | 10.27            | H attached to alpha-Cd                                 |
| 5.39     | Agonist    | 0.3                | 16.93            | Number of Aromatic Rings                               |
| 5.39     | Agonist    | 0.31               | 16.08            | H attached to C1sp3 or C0sp2                           |
| 5.39     | Agonist    | 0.37               | 25.97            | ES-Count: ssCH2                                        |
| 5.39     | Antagonist | 0.2                | 6.45             | Number of H-Acceptors                                  |
| 5.39     | Antagonist | 0.2                | 8.5              | H attached to C0sp3 with one X attached to next carbon |
| 5.39     | Antagonist | 0.21               | 4.96             | ES-Count: dssC                                         |
| 5.39     | Antagonist | 0.21               | 8                | ES-Count: aasC                                         |
| 5.39     | Gi         | 0.23               | 15.78            | C in CHR2X                                             |
| 5.39     | Gi         | 0.23               | 15.31            | Number of Hydrogens                                    |
| 5.39     | Gi         | 0.23               | 12.62            | Number of Ring Bonds                                   |
| 5.39     | Gi         | 0.23               | 17.54            | Number of Atoms                                        |
| 5.39     | Gi         | 0.24               | 18.72            | H attached to alpha-Cd                                 |
| 5.39     | Gi         | 0.24               | 16.27            | H attached to heteroatom                               |
| 5.39     | Gi         | 0.24               | 15.63            | Molecular Weight                                       |
| 5.39     | Gi         | 0.24               | 14.81            | C in CH2R2                                             |
| 5.39     | Gi         | 0.25               | 16.91            | Molecular Surface Area                                 |
| 5.39     | Gi         | 0.25               | 16.61            | Molecular Polar Surface Area                           |
| 5.39     | Gi         | 0.27               | 16.4             | H attached to C0sp3 with one X attached to next carbon |
| 5.39     | Gi         | 0.27               | 16.51            | C in R-C(=X)-X or X=C=X                                |
| 5.39     | Gi         | 0.27               | 29.07            | N in RCO-N< or >N-X=X                                  |
| 5.39     | Gq         | 0.27               | 13.71            | Number of Bonds                                        |
| 5.39     | Gq         | 0.27               | 15.76            | Number of Ring Bonds                                   |
| 5.39     | Gq         | 0.28               | 14.22            | ES-Count: dO                                           |
| 5.39     | Gq         | 0.29               | 14.31            | Number of Aromatic Rings                               |
| 5.39     | Gq         | 0.3                | 12.65            | O in =O                                                |
| 5.39     | Gq         | 0.34               | 12.71            | ES-Count: sssCH                                        |
| 5.39     | Gq         | 0.34               | 10.75            | C in CH2R2                                             |
| 5.39     | Gq         | 0.39               | 12.98            | Number of Hydrogens                                    |
| 5.40     | Antagonist | 0.2                | 7.54             | Number of Atoms                                        |
| 5.40     | Antagonist | 0.21               | 9.38             | Number of Bonds                                        |

| Position | Modus      | Mutual Information | Test Statistic S | Molecular Descriptor                                   |
|----------|------------|--------------------|------------------|--------------------------------------------------------|
| 5.40     | Antagonist | 0.21               | 9.81             | H attached to C0sp3 with one X attached to next carbon |
| 5.40     | Gq         | 0.28               | 12.32            | Molecular Surface Area                                 |
| 5.40     | Gq         | 0.29               | 11.6             | Number of Bonds                                        |
| 5.40     | Gq         | 0.32               | 11.14            | ES-Count: sssCH                                        |
| 5.40     | Gs         | 0.29               | 10.72            | ES-Count: dssC                                         |
| 5.41     | Agonist    | 0.29               | 24.23            | ES-Count: dsCH                                         |
| 5.41     | Agonist    | 0.29               | 16.03            | ES-Count: ssCH2                                        |
| 5.41     | Agonist    | 0.31               | 13.43            | O in phenol, enol, carboxyl OH                         |
| 5.41     | Agonist    | 0.34               | 14.21            | Number of Bonds                                        |
| 5.41     | Agonist    | 0.36               | 22.17            | N in Ar2NH, Ar3N, Ar2N-AI or R...N...R                 |
| 5.41     | Antagonist | 0.2                | 8.61             | Number of Atoms                                        |
| 5.41     | Antagonist | 0.2                | 8.02             | ES-Count: dssC                                         |
| 5.41     | Antagonist | 0.23               | 6.12             | Molecular Surface Area                                 |
| 5.41     | Antagonist | 0.24               | 7.93             | Molecular Weight                                       |
| 5.41     | Antagonist | 0.24               | 7.28             | Molecular Polar Surface Area                           |
| 5.41     | Gi         | 0.26               | 13.2             | H attached to C0sp3 with one X attached to next carbon |
| 5.41     | Gi         | 0.26               | 17.14            | H attached to heteroatom                               |
| 5.41     | Gi         | 0.28               | 12.69            | Number of H-Acceptors                                  |
| 5.41     | Gq         | 0.26               | 11.32            | Molecular Polar Surface Area                           |
| 5.41     | Gq         | 0.27               | 14.45            | Number of H-Donors                                     |
| 5.41     | Gs         | 0.3                | 12.72            | H attached to C0sp3 with one X attached to next carbon |
| 5.42     | Agonist    | 0.29               | 15.27            | Number of Atoms                                        |
| 5.42     | Agonist    | 0.3                | 12.53            | Number of H-Donors                                     |
| 5.42     | Agonist    | 0.31               | 21.14            | H attached to heteroatom                               |
| 5.42     | Agonist    | 0.37               | 17.77            | C in CHR2X                                             |
| 5.42     | Agonist    | 0.42               | 22.32            | Number of Bonds                                        |
| 5.42     | Antagonist | 0.2                | 8.12             | Number of Atoms                                        |
| 5.42     | Antagonist | 0.2                | 7.9              | H attached to C1sp3 or C0sp2                           |
| 5.42     | Antagonist | 0.21               | 9.27             | Molecular Surface Area                                 |
| 5.42     | Antagonist | 0.21               | 9.48             | Number of Aromatic Bonds                               |
| 5.42     | Antagonist | 0.22               | 7.87             | Number of Ring Bonds                                   |
| 5.42     | Antagonist | 0.24               | 8.8              | Number of H-Donors                                     |
| 5.42     | Antagonist | 0.24               | 7.81             | Number of H-Acceptors                                  |
| 5.42     | Antagonist | 0.25               | 9.6              | ES-Count: dO                                           |
| 5.42     | Antagonist | 0.25               | 6.43             | C in CH2R2                                             |
| 5.42     | Antagonist | 0.26               | 10.34            | C in CH2RX                                             |
| 5.42     | Antagonist | 0.26               | 8.4              | ES-Count: sOH                                          |
| 5.42     | Antagonist | 0.27               | 7.88             | ES-Count: ssNH                                         |
| 5.42     | Gi         | 0.23               | 14.99            | Molecular Weight                                       |
| 5.42     | Gi         | 0.23               | 13.14            | H attached to heteroatom                               |
| 5.42     | Gi         | 0.28               | 15.02            | Number of H-Acceptors                                  |
| 5.42     | Gi         | 0.32               | 16.54            | ES-Count: dO                                           |
| 5.42     | Gq         | 0.27               | 13.46            | O in alcohol                                           |
| 5.42     | Gq         | 0.33               | 13.91            | C in R--CR--R                                          |
| 5.42     | Gq         | 0.36               | 13.43            | H attached to C1sp3 or C0sp2                           |
| 5.42     | Gs         | 0.28               | 10.16            | H attached to alpha-Cd                                 |
| 5.42     | Gs         | 0.29               | 14.86            | Molecular Weight                                       |
| 5.43     | Agonist    | 0.3                | 15.01            | C in R--CR--R                                          |
| 5.43     | Agonist    | 0.34               | 17.68            | ES-Count: dO                                           |
| 5.43     | Antagonist | 0.21               | 8.95             | Number of Aromatic Bonds                               |

| Position | Modus      | Mutual Information | Test Statistic S | Molecular Descriptor                                   |
|----------|------------|--------------------|------------------|--------------------------------------------------------|
| 5.43     | Antagonist | 0.22               | 10.2             | ES-Count: ssNH                                         |
| 5.43     | Antagonist | 0.23               | 8.55             | Number of H-Acceptors                                  |
| 5.43     | Antagonist | 0.23               | 13.31            | Number of Rings                                        |
| 5.43     | Antagonist | 0.24               | 10.6             | H attached to heteroatom                               |
| 5.43     | Antagonist | 0.26               | 8.99             | C in CH2R2                                             |
| 5.43     | Gi         | 0.24               | 14.82            | Number of Aromatic Bonds                               |
| 5.43     | Gq         | 0.27               | 10.04            | C in CHR2X                                             |
| 5.43     | Gq         | 0.28               | 11.22            | Molecular Surface Area                                 |
| 5.43     | Gs         | 0.34               | 11.31            | ES-Count: sssCH                                        |
| 5.43     | Gs         | 0.39               | 12.56            | H attached to C0sp3 with no X attached next to C       |
| 5.45     | Gi         | 0.23               | 14.74            | Number of H-Acceptors                                  |
| 5.45     | Gi         | 0.26               | 16.88            | Number of Ring Bonds                                   |
| 5.46     | Agonist    | 0.32               | 17.75            | H attached to C0sp3 with no X attached next to C       |
| 5.46     | Agonist    | 0.33               | 23.46            | C in CH2R2                                             |
| 5.46     | Agonist    | 0.34               | 16.77            | O in phenol, enol, carboxyl OH                         |
| 5.46     | Agonist    | 0.35               | 15.84            | ES-Count: ssCH2                                        |
| 5.46     | Antagonist | 0.2                | 9.02             | ES-Count: dssC                                         |
| 5.46     | Antagonist | 0.21               | 10.74            | N in Al3N                                              |
| 5.46     | Antagonist | 0.21               | 7.05             | Number of Bonds                                        |
| 5.46     | Antagonist | 0.21               | 6.95             | O in =O                                                |
| 5.46     | Antagonist | 0.22               | 11.13            | Number of H-Donors                                     |
| 5.46     | Antagonist | 0.23               | 10.27            | ES-Count: ssNH                                         |
| 5.46     | Antagonist | 0.25               | 10.9             | C in CH2R2                                             |
| 5.46     | Antagonist | 0.25               | 7.58             | Number of Ring Bonds                                   |
| 5.46     | Antagonist | 0.28               | 15.15            | H attached to heteroatom                               |
| 5.46     | Gq         | 0.27               | 16.8             | O in =O                                                |
| 5.46     | Gq         | 0.27               | 16.75            | H attached to C0sp3 with no X attached next to C       |
| 5.46     | Gq         | 0.3                | 14.08            | Number of Ring Bonds                                   |
| 5.46     | Gq         | 0.31               | 11.96            | Molecular Weight                                       |
| 5.46     | Gq         | 0.31               | 13.98            | ES-Count: dO                                           |
| 5.46     | Gq         | 0.33               | 10.59            | Number of Atoms                                        |
| 5.46     | Gs         | 0.28               | 12.01            | Number of H-Donors                                     |
| 5.46     | Gs         | 0.29               | 8.78             | Number of Rings                                        |
| 5.46     | Gs         | 0.29               | 10.44            | ES-Count: sOH                                          |
| 5.46     | Gs         | 0.3                | 12.12            | Number of Atoms                                        |
| 5.46     | Gs         | 0.31               | 12.48            | Molecular Weight                                       |
| 5.48     | Agonist    | 0.29               | 25.87            | ES-Count: dsCH                                         |
| 5.48     | Gq         | 0.27               | 27.66            | ES-Count: aaN                                          |
| 5.51     | Gs         | 0.29               | 12.03            | Molecular Polar Surface Area                           |
| 5.57     | Antagonist | 0.2                | 6.96             | Number of Aromatic Bonds                               |
| 5.57     | Antagonist | 0.21               | 8.36             | ES-Count: dO                                           |
| 5.57     | Gq         | 0.31               | 13.44            | H attached to heteroatom                               |
| 5.57     | Gq         | 0.32               | 20.51            | ES-Count: aaaC                                         |
| 5.57     | Gq         | 0.33               | 16.03            | N in Ar2NH, Ar3N, Ar2N-Al or R...N...R                 |
| 5.57     | Gs         | 0.28               | 12.32            | H attached to alpha-Cd                                 |
| 5.57     | Gs         | 0.28               | 11.2             | N in Al3N                                              |
| 5.59     | Gq         | 0.29               | 10.69            | Number of Ring Bonds                                   |
| 5.59     | Gq         | 0.31               | 10.38            | H attached to C0sp3 with one X attached to next carbon |
| 5.60     | Gi         | 0.24               | 12.7             | ES-Count: dO                                           |

| Position | Modus      | Mutual Information | Test Statistic S | Molecular Descriptor                             |
|----------|------------|--------------------|------------------|--------------------------------------------------|
| 5.60     | Gs         | 0.29               | 13.61            | Molecular Weight                                 |
| 5.60     | Gs         | 0.31               | 14.13            | Number of Rings                                  |
| 5.60     | Gs         | 0.33               | 10.87            | Number of Bonds                                  |
| 5.62     | Gs         | 0.28               | 15.47            | ES-Count: sssCH                                  |
| 5.64     | Gs         | 0.29               | 8.09             | ES-Count: aasC                                   |
| 6.33     | Agonist    | 0.35               | 21.98            | Number of Atoms                                  |
| 6.33     | Agonist    | 0.35               | 19.96            | H attached to heteroatom                         |
| 6.35     | Agonist    | 0.29               | 14.97            | O in alcohol                                     |
| 6.38     | Agonist    | 0.33               | 21.23            | H attached to alpha-Cd                           |
| 6.38     | Agonist    | 0.37               | 24.12            | H attached to C1sp3 or C0sp2                     |
| 6.38     | Antagonist | 0.22               | 11.15            | Molecular Surface Area                           |
| 6.38     | Antagonist | 0.22               | 11.62            | Number of H-Acceptors                            |
| 6.38     | Antagonist | 0.23               | 9.89             | Number of Rings                                  |
| 6.38     | Antagonist | 0.23               | 11.92            | ES-Count: sOH                                    |
| 6.38     | Antagonist | 0.24               | 12.08            | Number of Bridge Bonds                           |
| 6.38     | Gi         | 0.25               | 20.95            | Molecular Surface Area                           |
| 6.38     | Gq         | 0.28               | 14.51            | N in R--N--R or R--N--X                          |
| 6.38     | Gq         | 0.3                | 13.88            | Number of Ring Bonds                             |
| 6.38     | Gq         | 0.3                | 14.34            | ES-Count: sssCH                                  |
| 6.39     | Gq         | 0.27               | 13.51            | O in =O                                          |
| 6.39     | Gq         | 0.32               | 12.73            | ES-Count: ssCH2                                  |
| 6.39     | Gq         | 0.32               | 14.39            | ES-Count: sssCH                                  |
| 6.42     | Agonist    | 0.29               | 18.5             | Molecular Weight                                 |
| 6.42     | Agonist    | 0.31               | 18.55            | ES-Count: aaaC                                   |
| 6.42     | Antagonist | 0.22               | 11.58            | O in =O                                          |
| 6.42     | Antagonist | 0.23               | 11.41            | ES-Count: dO                                     |
| 6.42     | Gi         | 0.23               | 19.12            | ES-Count: dssC                                   |
| 6.42     | Gq         | 0.26               | 10.33            | ES-Count: dsCH                                   |
| 6.42     | Gq         | 0.27               | 13.71            | ES-Count: ssCH2                                  |
| 6.42     | Gq         | 0.31               | 14               | O in =O                                          |
| 6.45     | Gs         | 0.3                | 14.93            | Molecular Polar Surface Area                     |
| 6.49     | Gi         | 0.24               | 13.12            | Number of Bridge Bonds                           |
| 6.49     | Gq         | 0.27               | 9.79             | C in CH2R2                                       |
| 6.49     | Gq         | 0.3                | 15.17            | C in R--CR--R                                    |
| 6.51     | Gi         | 0.23               | 20.75            | Molecular Surface Area                           |
| 6.52     | Agonist    | 0.3                | 20.73            | C in CH2R2                                       |
| 6.52     | Agonist    | 0.31               | 31.1             | Number of H-Donors                               |
| 6.52     | Agonist    | 0.31               | 23.27            | Molecular Weight                                 |
| 6.52     | Agonist    | 0.36               | 32.57            | C in CHR2X                                       |
| 6.52     | Agonist    | 0.39               | 21.72            | C in =CHR                                        |
| 6.52     | Agonist    | 0.41               | 26.99            | ES-Count: dsCH                                   |
| 6.52     | Antagonist | 0.2                | 8.84             | ES-Count: aasC                                   |
| 6.52     | Antagonist | 0.2                | 12.5             | Number of H-Donors                               |
| 6.52     | Antagonist | 0.22               | 13.52            | Number of Rings                                  |
| 6.52     | Antagonist | 0.25               | 11.29            | O in phenol, enol, carboxyl OH                   |
| 6.52     | Antagonist | 0.28               | 16.72            | Molecular Surface Area                           |
| 6.52     | Antagonist | 0.28               | 16.99            | Molecular Weight                                 |
| 6.52     | Gi         | 0.23               | 17.69            | Molecular Weight                                 |
| 6.52     | Gi         | 0.24               | 16.05            | H attached to C0sp3 with no X attached next to C |
| 6.52     | Gi         | 0.24               | 17.45            | Number of H-Donors                               |
| 6.52     | Gi         | 0.24               | 19.81            | C in CHR2X                                       |
| 6.52     | Gi         | 0.25               | 17.29            | C in CH2R2                                       |
| 6.52     | Gi         | 0.25               | 20.13            | H attached to heteroatom                         |

| Position | Modus      | Mutual Information | Test Statistic S | Molecular Descriptor                                   |
|----------|------------|--------------------|------------------|--------------------------------------------------------|
| 6.52     | Gi         | 0.26               | 21.83            | Molecular Surface Area                                 |
| 6.52     | Gi         | 0.31               | 21.9             | ES-Count: ssCH2                                        |
| 6.52     | Gi         | 0.32               | 20.04            | ES-Count: aasC                                         |
| 6.52     | Gq         | 0.26               | 27.42            | H attached to C0sp3 with no X attached next to C       |
| 6.52     | Gq         | 0.29               | 24.44            | Number of Atoms                                        |
| 6.52     | Gq         | 0.3                | 20.16            | Number of Bonds                                        |
| 6.52     | Gq         | 0.3                | 19.6             | Molecular Weight                                       |
| 6.52     | Gq         | 0.34               | 17.54            | ES-Count: dsCH                                         |
| 6.52     | Gq         | 0.35               | 17.28            | Number of Rings                                        |
| 6.52     | Gs         | 0.29               | 18.52            | N in R--N--R or R--N--X                                |
| 6.52     | Gs         | 0.29               | 9.67             | ES-Count: aasC                                         |
| 6.52     | Gs         | 0.3                | 11.62            | Molecular Polar Surface Area                           |
| 6.52     | Gs         | 0.32               | 12.23            | C in CH2RX                                             |
| 6.52     | Gs         | 0.32               | 17.65            | ES-Count: sssCH                                        |
| 6.52     | Gs         | 0.33               | 13.75            | Number of Rings                                        |
| 6.54     | Gq         | 0.26               | 11.03            | ES-Count: dO                                           |
| 6.55     | Agonist    | 0.29               | 19.8             | Number of Atoms                                        |
| 6.55     | Antagonist | 0.21               | 4.85             | ES-Count: sOH                                          |
| 6.55     | Antagonist | 0.21               | 6.86             | ES-Count: dssC                                         |
| 6.55     | Antagonist | 0.21               | 6.5              | ES-Count: sssCH                                        |
| 6.55     | Antagonist | 0.21               | 7.93             | ES-Count: dO                                           |
| 6.55     | Gq         | 0.27               | 8.03             | ES-Count: ssCH2                                        |
| 6.55     | Gq         | 0.31               | 13.44            | ES-Count: ssO                                          |
| 6.55     | Gs         | 0.28               | 7.53             | ES-Count: sssCH                                        |
| 6.55     | Gs         | 0.29               | 7.55             | ES-Count: dsCH                                         |
| 6.56     | Gq         | 0.28               | 14.68            | O in phenol, enol, carboxyl OH                         |
| 6.56     | Gq         | 0.29               | 13.13            | N in Al3N                                              |
| 6.56     | Gq         | 0.33               | 13.76            | C in CH2R2                                             |
| 6.58     | Agonist    | 0.29               | 16.26            | H attached to C0sp3 with one X attached to next carbon |
| 6.58     | Agonist    | 0.33               | 12.64            | C in CHR2X                                             |
| 6.58     | Agonist    | 0.34               | 11.05            | H attached to C1sp3 or C0sp2                           |
| 6.58     | Antagonist | 0.2                | 3.72             | H attached to C0sp3 with no X attached next to C       |
| 6.58     | Antagonist | 0.2                | 5.69             | Number of Rings                                        |
| 6.58     | Antagonist | 0.21               | 11.3             | Number of Bonds                                        |
| 6.58     | Antagonist | 0.21               | 4.7              | Number of H-Acceptors                                  |
| 6.58     | Antagonist | 0.21               | 5.94             | Number of H-Donors                                     |
| 6.58     | Antagonist | 0.21               | 8.01             | C in CH2R2                                             |
| 6.58     | Antagonist | 0.22               | 6.19             | Number of Atoms                                        |
| 6.58     | Antagonist | 0.23               | 6.53             | H attached to C1sp3 or C0sp2                           |
| 6.58     | Antagonist | 0.23               | 3.83             | ES-Count: sssCH                                        |
| 6.58     | Antagonist | 0.24               | 4.98             | Molecular Weight                                       |
| 6.58     | Antagonist | 0.25               | 5.94             | Molecular Surface Area                                 |
| 6.58     | Gi         | 0.23               | 5.47             | C in CH2R2                                             |
| 6.58     | Gi         | 0.24               | 10.59            | H attached to C0sp3 with no X attached next to C       |
| 6.58     | Gi         | 0.24               | 8.18             | H attached to alpha-Cd                                 |
| 6.58     | Gq         | 0.27               | 14.86            | Number of Atoms                                        |
| 6.58     | Gq         | 0.28               | 13.74            | Molecular Weight                                       |
| 6.58     | Gq         | 0.31               | 12.5             | H attached to alpha-Cd                                 |
| 6.58     | Gq         | 0.32               | 11.95            | Number of Hydrogens                                    |
| 6.58     | Gq         | 0.38               | 12.3             | Number of Aromatic Rings                               |



| Position | Modus      | Mutual Information | Test Statistic S | Molecular Descriptor                                   |
|----------|------------|--------------------|------------------|--------------------------------------------------------|
| 6.58     | Gq         | 0.4                | 11.96            | H attached to C0sp3 with one X attached to next carbon |
| 6.58     | Gs         | 0.28               | 7.86             | Number of Bonds                                        |
| 6.59     | Antagonist | 0.21               | 5.07             | Number of H-Acceptors                                  |
| 6.59     | Antagonist | 0.21               | 6.33             | Number of H-Donors                                     |
| 6.59     | Antagonist | 0.21               | 9.13             | ES-Count: dssC                                         |
| 6.59     | Antagonist | 0.21               | 7.15             | C in CH2RX                                             |
| 6.59     | Gi         | 0.23               | 14.23            | C in CHR2X                                             |
| 7.32     | Agonist    | 0.29               | 10.43            | Number of Atoms                                        |
| 7.32     | Agonist    | 0.3                | 13.37            | ES-Count: ssCH2                                        |
| 7.32     | Agonist    | 0.32               | 9.81             | ES-Count: sssCH                                        |
| 7.32     | Agonist    | 0.34               | 9.47             | C in R--CR--R                                          |
| 7.32     | Gi         | 0.23               | 11.68            | Molecular Weight                                       |
| 7.32     | Gi         | 0.24               | 8.24             | ES-Count: sOH                                          |
| 7.32     | Gi         | 0.25               | 10.52            | Molecular Surface Area                                 |
| 7.32     | Gi         | 0.27               | 10.31            | C in CHR2X                                             |
| 7.32     | Gq         | 0.26               | 7.37             | Number of Bonds                                        |
| 7.32     | Gq         | 0.29               | 14.12            | Number of Aromatic Rings                               |
| 7.32     | Gq         | 0.29               | 8.8              | ES-Count: dssC                                         |
| 7.32     | Gq         | 0.34               | 9.9              | Molecular Weight                                       |
| 7.32     | Gq         | 0.39               | 11               | Number of Rings                                        |
| 7.32     | Gq         | 0.4                | 9.89             | C in R--CR--R                                          |
| 7.32     | Gs         | 0.28               | 6.78             | ES-Count: dsCH                                         |
| 7.32     | Gs         | 0.29               | 5.64             | Molecular Weight                                       |
| 7.32     | Gs         | 0.29               | 5.92             | Number of Atoms                                        |
| 7.33     | Antagonist | 0.21               | 6.12             | Molecular Surface Area                                 |
| 7.33     | Antagonist | 0.21               | 3.12             | H attached to C1sp3 or C0sp2                           |
| 7.33     | Antagonist | 0.24               | 5.25             | Number of Rings                                        |
| 7.33     | Antagonist | 0.26               | 6.28             | ES-Count: aasC                                         |
| 7.33     | Gq         | 0.29               | 10.31            | Molecular Surface Area                                 |
| 7.33     | Gq         | 0.3                | 7.67             | ES-Count: dsCH                                         |
| 7.33     | Gq         | 0.32               | 7.73             | C in CH2R2                                             |
| 7.33     | Gs         | 0.29               | 9.29             | Molecular Surface Area                                 |
| 7.33     | Gs         | 0.29               | 9.44             | Number of Hydrogens                                    |
| 7.33     | Gs         | 0.29               | 9.6              | O in phenol, enol, carboxyl OH                         |
| 7.34     | Agonist    | 0.29               | 12.73            | Number of Atoms                                        |
| 7.34     | Agonist    | 0.32               | 15.36            | H attached to C1sp3 or C0sp2                           |
| 7.34     | Antagonist | 0.21               | 9.85             | H attached to heteroatom                               |
| 7.34     | Gs         | 0.28               | 9.09             | H attached to alpha-Cd                                 |
| 7.34     | Gs         | 0.3                | 10.63            | Number of Bonds                                        |
| 7.34     | Gs         | 0.31               | 9.75             | Molecular Polar Surface Area                           |
| 7.34     | Gs         | 0.33               | 12.66            | Number of Ring Bonds                                   |
| 7.34     | Gs         | 0.33               | 7.68             | C in CHR3                                              |
| 7.35     | Agonist    | 0.29               | 18.44            | C in R--CR--R                                          |
| 7.35     | Antagonist | 0.21               | 4.61             | Number of H-Acceptors                                  |
| 7.35     | Antagonist | 0.25               | 8.22             | H attached to heteroatom                               |
| 7.35     | Antagonist | 0.27               | 10.25            | ES-Count: aasC                                         |
| 7.35     | Gq         | 0.26               | 9.4              | ES-Count: dO                                           |
| 7.35     | Gs         | 0.31               | 6.85             | ES-Count: aasC                                         |
| 7.35     | Gs         | 0.31               | 9.99             | C in CHR3                                              |
| 7.35     | Gs         | 0.31               | 10.15            | ES-Count: sssCH                                        |
| 7.35     | Gs         | 0.34               | 10.51            | Molecular Surface Area                                 |
| 7.36     | Agonist    | 0.3                | 10.34            | H attached to heteroatom                               |
| 7.36     | Agonist    | 0.32               | 16.71            | Number of H-Donors                                     |

| Position | Modus      | Mutual Information | Test Statistic S | Molecular Descriptor                    |
|----------|------------|--------------------|------------------|-----------------------------------------|
| 7.36     | Agonist    | 0.33               | 14.14            | Molecular Polar Surface Area            |
| 7.36     | Agonist    | 0.37               | 14.18            | C in R--CR--R                           |
| 7.36     | Agonist    | 0.38               | 26.68            | ES-Count: sssCH                         |
| 7.36     | Antagonist | 0.2                | 7.26             | Number of H-Acceptors                   |
|          |            |                    |                  | H attached to C0sp3 with one X attached |
|          |            |                    |                  | to next carbon                          |
| 7.36     | Antagonist | 0.21               | 11.66            |                                         |
| 7.36     | Antagonist | 0.22               | 4.38             | ES-Count: aasC                          |
| 7.36     | Antagonist | 0.23               | 7.08             | Number of H-Donors                      |
| 7.36     | Antagonist | 0.23               | 5.68             | Number of Rings                         |
| 7.36     | Antagonist | 0.24               | 7.01             | N in Al3N                               |
| 7.36     | Gi         | 0.23               | 9.59             | Number of H-Acceptors                   |
| 7.36     | Gi         | 0.24               | 11.64            | H attached to heteroatom                |
| 7.36     | Gi         | 0.24               | 14.2             | H attached to alpha-Cd                  |
| 7.36     | Gi         | 0.24               | 6.81             | ES-Count: sssCH                         |
| 7.36     | Gi         | 0.24               | 14.38            | C in CHR2X                              |
|          |            |                    |                  | H attached to C0sp3 with no X attached  |
|          |            |                    |                  | next to C                               |
| 7.36     | Gi         | 0.26               | 13.92            |                                         |
| 7.36     | Gi         | 0.27               | 12.74            | C in CH2R2                              |
| 7.36     | Gi         | 0.31               | 26.3             | Number of Hydrogens                     |
| 7.36     | Gi         | 0.32               | 20.14            | Number of Bonds                         |
| 7.36     | Gi         | 0.33               | 14.84            | Number of Atoms                         |
| 7.36     | Gi         | 0.34               | 16.17            | Molecular Weight                        |
| 7.36     | Gq         | 0.27               | 13.16            | Number of Bonds                         |
| 7.36     | Gq         | 0.27               | 9.44             | Molecular Weight                        |
| 7.36     | Gq         | 0.3                | 10.41            | Number of Hydrogens                     |
| 7.36     | Gq         | 0.32               | 9.21             | H attached to alpha-Cd                  |
| 7.36     | Gq         | 0.35               | 9.88             | H attached to C1sp3 or C0sp2            |
| 7.36     | Gs         | 0.28               | 10.49            | N in R--N--R or R--N--X                 |
| 7.38     | Agonist    | 0.4                | 20.41            | Molecular Weight                        |
| 7.38     | Agonist    | 0.4                | 32.44            | Number of Rotatable Bonds               |
| 7.38     | Agonist    | 0.42               | 23.82            | ES-Count: ssO                           |
| 7.38     | Antagonist | 0.21               | 10.17            | Molecular Surface Area                  |
| 7.38     | Antagonist | 0.22               | 8.46             | C in CH2R2                              |
| 7.38     | Antagonist | 0.25               | 12.86            | Number of Rings                         |
| 7.38     | Antagonist | 0.27               | 13.14            | Number of Aromatic Bonds                |
| 7.38     | Gi         | 0.28               | 18.92            | Number of Bridge Bonds                  |
| 7.38     | Gi         | 0.34               | 23.06            | Molecular Surface Area                  |
| 7.38     | Gq         | 0.26               | 12.89            | ES-Count: aaaC                          |
| 7.38     | Gq         | 0.28               | 21.46            | Number of Rotatable Bonds               |
| 7.38     | Gq         | 0.34               | 14.3             | ES-Count: sssN                          |
| 7.38     | Gq         | 0.36               | 16.94            | C in CH2RX                              |
| 7.38     | Gs         | 0.3                | 9.71             | H attached to C1sp3 or C0sp2            |
|          |            |                    |                  | H attached to C0sp3 with no X attached  |
|          |            |                    |                  | next to C                               |
| 7.39     | Antagonist | 0.2                | 9.39             |                                         |
| 7.39     | Antagonist | 0.21               | 11.32            | ES-Count: dO                            |
| 7.39     | Antagonist | 0.22               | 7.26             | Number of Aromatic Bonds                |
| 7.39     | Gq         | 0.26               | 10.69            | Number of Ring Assemblies               |
| 7.39     | Gq         | 0.27               | 15.56            | N in RCO-N< or >N-X=X                   |
| 7.40     | Agonist    | 0.29               | 34.93            | ES-Count: dsCH                          |
| 7.40     | Agonist    | 0.3                | 17.99            | C in CHR2X                              |
| 7.40     | Agonist    | 0.3                | 23.02            | Molecular Weight                        |
| 7.40     | Agonist    | 0.32               | 24.67            | H attached to heteroatom                |
| 7.40     | Agonist    | 0.36               | 17.19            | Number of H-Donors                      |
| 7.40     | Agonist    | 0.4                | 31.21            | Number of Ring Bonds                    |

| Position | Modus      | Mutual Information | Test Statistic S | Molecular Descriptor                                   |
|----------|------------|--------------------|------------------|--------------------------------------------------------|
| 7.40     | Antagonist | 0.21               | 8.75             | N in Al3N                                              |
| 7.40     | Antagonist | 0.21               | 14.77            | Number of Ring Bonds                                   |
| 7.40     | Gq         | 0.26               | 16.37            | Molecular Weight                                       |
| 7.40     | Gq         | 0.29               | 28.61            | Number of Bonds                                        |
| 7.40     | Gq         | 0.31               | 18.39            | Number of Aromatic Rings                               |
| 7.40     | Gq         | 0.37               | 27.26            | Molecular Surface Area                                 |
| 7.40     | Gs         | 0.28               | 10.96            | Molecular Weight                                       |
| 7.40     | Gs         | 0.3                | 10.02            | C in CHR3                                              |
| 7.42     | Agonist    | 0.29               | 17.69            | Number of H-Donors                                     |
| 7.42     | Agonist    | 0.31               | 27.51            | Number of Hydrogens                                    |
| 7.42     | Agonist    | 0.33               | 22.55            | N in R--N--R or R--N--X                                |
| 7.42     | Agonist    | 0.36               | 21.1             | ES-Count: aaN                                          |
| 7.42     | Agonist    | 0.42               | 22.59            | C in CHR2X                                             |
| 7.42     | Antagonist | 0.21               | 9.59             | O in =O                                                |
| 7.42     | Antagonist | 0.23               | 13.3             | Number of H-Acceptors                                  |
| 7.42     | Antagonist | 0.23               | 11.61            | Number of Ring Bonds                                   |
| 7.42     | Antagonist | 0.24               | 13.14            | Number of H-Donors                                     |
| 7.42     | Antagonist | 0.26               | 12.69            | Number of Atoms                                        |
| 7.42     |            |                    |                  | H attached to C0sp3 with no X attached next to C       |
| 7.42     | Gi         | 0.25               | 22.55            |                                                        |
| 7.42     | Gq         | 0.28               | 13.98            | ES-Count: dssC                                         |
| 7.42     | Gq         | 0.29               | 17.77            | Number of Ring Bonds                                   |
| 7.42     | Gq         | 0.29               | 15.04            | Molecular Surface Area                                 |
| 7.42     | Gs         | 0.28               | 16.86            | Number of Hydrogens                                    |
| 7.42     | Gs         | 0.29               | 9.55             | ES-Count: dsCH                                         |
| 7.42     | Gs         | 0.3                | 10.07            | H attached to heteroatom                               |
| 7.42     | Gs         | 0.3                | 13.66            | C in =CHR                                              |
| 7.43     | Agonist    | 0.3                | 19.92            | Number of H-Donors                                     |
| 7.43     | Agonist    | 0.31               | 41.15            | C in =CHR                                              |
| 7.43     | Antagonist | 0.2                | 14.49            | N in Al3N                                              |
| 7.43     | Antagonist | 0.21               | 14.98            | ES-Count: sssCH                                        |
| 7.43     | Gs         | 0.28               | 11.74            | Molecular Polar Surface Area                           |
| 7.44     | Gs         | 0.28               | 8.49             | Number of H-Donors                                     |
| 7.44     |            |                    |                  | H attached to C0sp3 with one X attached to next carbon |
| 7.44     | Gs         | 0.31               | 9.22             |                                                        |
| 7.47     | Agonist    | 0.3                | 12.15            | C in CH2R2                                             |
| 7.47     | Agonist    | 0.3                | 25.99            | Molecular Polar Surface Area                           |
| 7.47     | Agonist    | 0.3                | 25.4             | Number of H-Donors                                     |
| 7.47     | Agonist    | 0.3                | 17.56            | H attached to heteroatom                               |
| 7.47     | Agonist    | 0.34               | 23.07            | Number of Ring Bonds                                   |
| 7.47     | Agonist    | 0.35               | 20.26            | O in phenol, enol, carboxyl OH                         |
| 7.47     | Agonist    | 0.36               | 23.44            | C in CHR3                                              |
| 7.47     | Agonist    | 0.38               | 33.97            | ES-Count: aasC                                         |
| 7.47     | Gi         | 0.23               | 11.85            | Number of Atoms                                        |
| 7.47     | Gi         | 0.24               | 13.83            | H attached to heteroatom                               |
| 7.47     | Gi         | 0.25               | 14.71            | C in CHR2X                                             |
| 7.47     | Gi         | 0.25               | 13.21            | Molecular Surface Area                                 |
| 7.47     | Gi         | 0.26               | 18.88            | Molecular Weight                                       |
| 7.47     | Gq         | 0.27               | 14.05            | ES-Count: aasC                                         |
| 7.47     | Gq         | 0.29               | 13.47            | ES-Count: sssCH                                        |
| 7.47     |            |                    |                  | H attached to C0sp3 with no X attached next to C       |
| 7.54     | Agonist    | 0.29               | 26.37            |                                                        |
| 7.54     | Agonist    | 0.31               | 24.44            | Number of Aromatic Rings                               |
| 7.54     | Agonist    | 0.31               | 24.5             | ES-Count: ssCH2                                        |

| Position | Modus      | Mutual Information | Test Statistic S | Molecular Descriptor                                                     |
|----------|------------|--------------------|------------------|--------------------------------------------------------------------------|
| 7.54     | Agonist    | 0.34               | 20.21            | ES-Count: dsCH                                                           |
| 7.54     | Agonist    | 0.37               | 21.41            | Number of H-Donors                                                       |
| 7.54     | Agonist    | 0.37               | 21.49            | C in =CHR                                                                |
| 7.54     | Agonist    | 0.4                | 29.08            | ES-Count: aasC<br>H attached to C0sp3 with no X attached next to C       |
| 7.54     | Antagonist | 0.2                | 16.94            | Number of Aromatic Rings                                                 |
| 7.54     | Antagonist | 0.2                | 10.48            | Number of Hydrogens                                                      |
| 7.54     | Antagonist | 0.21               | 13.96            | ES-Count: dO                                                             |
| 7.54     | Antagonist | 0.21               | 9.13             | ES-Count: dssC                                                           |
| 7.54     | Antagonist | 0.22               | 11.94            | Number of Bonds                                                          |
| 7.54     | Antagonist | 0.22               | 9.37             | ES-Count: aasC                                                           |
| 7.54     | Antagonist | 0.23               | 11.55            | H attached to C1sp3 or C0sp2                                             |
| 7.54     | Gi         | 0.23               | 16.39            | Number of H-Donors                                                       |
| 7.54     | Gi         | 0.24               | 16.88            | Number of Bonds                                                          |
| 7.54     | Gi         | 0.24               | 19.42            | Number of Hydrogens                                                      |
| 7.54     | Gi         | 0.24               | 18.06            | ES-Count: aasC                                                           |
| 7.54     | Gi         | 0.24               | 13.93            | C in R-C(=X)-X or X=C=X                                                  |
| 7.54     | Gi         | 0.24               | 18.46            | Number of Ring Bonds<br>H attached to C0sp3 with no X attached next to C |
| 7.54     | Gi         | 0.25               | 27.04            | Molecular Surface Area                                                   |
| 7.54     | Gi         | 0.26               | 18.53            | C in CHR2X                                                               |
| 7.54     | Gi         | 0.28               | 19.28            | ES-Count: ssCH2                                                          |
| 7.54     | Gi         | 0.29               | 22.34            | H attached to heteroatom                                                 |
| 7.54     | Gi         | 0.3                | 18.83            | Molecular Weight                                                         |
| 7.54     | Gi         | 0.31               | 18.72            | ES-Count: dssC                                                           |
| 7.54     | Gq         | 0.26               | 19.65            | Number of Bonds                                                          |
| 7.54     | Gq         | 0.3                | 13.08            | Number of H-Donors                                                       |
| 7.54     | Gq         | 0.31               | 22.38            | ES-Count: dO                                                             |
| 7.54     | Gq         | 0.34               | 14.92            | Number of Hydrogens                                                      |
| 7.54     | Gq         | 0.39               | 16.59            | C in CH2R2                                                               |
| 7.54     | Gq         | 0.41               | 14.9             | H attached to C0sp3 with one X attached to next carbon                   |
| 7.54     | Gs         | 0.28               | 11.76            | Number of Aromatic Rings                                                 |
| 7.54     | Gs         | 0.28               | 15.52            | Number of Atoms                                                          |
| 7.54     | Gs         | 0.3                | 13.04            | Molecular Weight                                                         |
| 7.54     | Gs         | 0.3                | 12.93            | O in phenol, enol, carboxyl OH                                           |
| 7.54     | Gs         | 0.32               | 12.34            | ES-Count: sssCH                                                          |
| 7.54     | Gs         | 0.32               | 11.52            | Molecular Surface Area                                                   |
| 7.56     | Agonist    | 0.29               | 17.84            | O in alcohol                                                             |
| 7.56     | Agonist    | 0.3                | 24.02            | C in CH2R2                                                               |
| 7.56     | Agonist    | 0.3                | 17.91            | ES-Count: ssCH2                                                          |
| 7.56     | Agonist    | 0.32               | 18.73            | H attached to C0sp3 with no X attached next to C                         |
| 7.56     | Antagonist | 0.2                | 11.12            | Number of H-Acceptors                                                    |
| 7.56     | Antagonist | 0.23               | 11.39            | ES-Count: sOH                                                            |
| 7.56     | Antagonist | 0.23               | 11.98            | C in CH2R2                                                               |
| 7.56     | Antagonist | 0.24               | 14.58            | C in CHR2X                                                               |
| 7.56     | Gi         | 0.23               | 19.58            | H attached to heteroatom                                                 |
| 7.56     | Gi         | 0.23               | 16.11            | O in =O                                                                  |
| 7.56     | Gi         | 0.23               | 17.8             | Molecular Weight                                                         |
| 7.56     | Gq         | 0.29               | 18.28            | ES-Count: ssCH2                                                          |
| 7.56     | Gq         | 0.32               | 16.37            | C in CH2R2                                                               |
| 7.56     | Gq         | 0.33               | 17.01            |                                                                          |

| Position | Modus      | Mutual Information | Test Statistic S | Molecular Descriptor                                   |
|----------|------------|--------------------|------------------|--------------------------------------------------------|
| 8.47     | Agonist    | 0.29               | 16.6             | H attached to C0sp3 with no X attached next to C       |
| 8.47     | Agonist    | 0.3                | 23.37            | C in =CHR                                              |
| 8.47     | Agonist    | 0.3                | 22.96            | ES-Count: dsCH                                         |
| 8.47     | Agonist    | 0.3                | 29.62            | C in CH2R2                                             |
| 8.47     | Agonist    | 0.31               | 17.54            | H attached to heteroatom                               |
| 8.47     | Agonist    | 0.33               | 38.83            | Molecular Polar Surface Area                           |
| 8.47     | Agonist    | 0.33               | 34.75            | Number of H-Donors                                     |
| 8.47     | Agonist    | 0.34               | 21.17            | ES-Count: ssCH2                                        |
| 8.47     | Agonist    | 0.37               | 28.83            | C in CHR2X                                             |
| 8.47     | Agonist    | 0.46               | 38.22            | Number of Aromatic Rings                               |
| 8.47     | Antagonist | 0.21               | 11.46            | H attached to heteroatom                               |
| 8.47     | Antagonist | 0.22               | 13.43            | Number of Ring Bonds                                   |
| 8.47     | Gq         | 0.26               | 11.05            | Number of Hydrogens                                    |
| 8.49     | Gq         | 0.27               | 10.03            | Molecular Surface Area                                 |
| 8.49     | Gs         | 0.28               | 10.45            | ES-Count: sssCH                                        |
| 8.49     | Gs         | 0.29               | 10.47            | Molecular Polar Surface Area                           |
| 8.50     | Gs         | 0.28               | 23.18            | ES-Count: sssCH                                        |
| 8.50     | Gs         | 0.3                | 23.58            | Number of H-Acceptors                                  |
| 8.53     | Agonist    | 0.34               | 16.31            | O in alcohol                                           |
| 8.53     | Agonist    | 0.34               | 17.4             | Number of H-Donors                                     |
| 8.53     | Antagonist | 0.2                | 5.96             | H attached to heteroatom                               |
| 8.53     | Antagonist | 0.21               | 9.11             | ES-Count: aasC                                         |
| 8.53     | Antagonist | 0.21               | 11.81            | H attached to C0sp3 with one X attached to next carbon |
| 8.53     | Antagonist | 0.23               | 11.26            | H attached to alpha-Cd                                 |
| 8.53     | Gi         | 0.23               | 15.11            | C in R--CH--R                                          |
| 8.53     | Gi         | 0.23               | 23.1             | Number of Rotatable Bonds                              |
| 8.53     | Gi         | 0.24               | 16.69            | Number of Hydrogens                                    |
| 8.53     | Gi         | 0.24               | 18.08            | ES-Count: aaCH                                         |
| 8.53     | Gi         | 0.25               | 18.35            | H attached to alpha-Cd                                 |
| 8.53     | Gi         | 0.25               | 21.28            | Number of Atoms                                        |
| 8.53     | Gi         | 0.25               | 11.27            | Number of Bonds                                        |
| 8.53     | Gi         | 0.25               | 18.87            | Number of H-Acceptors                                  |
| 8.53     | Gi         | 0.25               | 12.84            | ES-Count: sssCH                                        |
| 8.53     | Gi         | 0.25               | 17.23            | Molecular Weight                                       |
| 8.53     | Gi         | 0.25               | 19.97            | C in CHR2X                                             |
| 8.53     | Gi         | 0.26               | 15.94            | Molecular Surface Area                                 |
| 8.53     | Gi         | 0.26               | 16.17            | C in CH2R2                                             |
| 8.53     | Gi         | 0.26               | 16.23            | O in =O                                                |
| 8.53     | Gi         | 0.27               | 14.62            | ES-Count: ssCH2                                        |
| 8.53     | Gi         | 0.27               | 15.34            | C in R-C(=X)-X or X=C=X                                |
| 8.53     | Gi         | 0.28               | 16.82            | ES-Count: dO                                           |
| 8.53     | Gi         | 0.28               | 15.52            | Number of H-Donors                                     |
| 8.53     | Gi         | 0.28               | 17.85            | Molecular Polar Surface Area                           |
| 8.53     | Gi         | 0.29               | 17.24            | ES-Count: sOH                                          |
| 8.53     | Gi         | 0.31               | 19.58            | ES-Count: dssC                                         |
| 8.53     | Gq         | 0.27               | 15.33            | C in CH2R2                                             |
| 8.53     | Gq         | 0.28               | 10.95            | Molecular Polar Surface Area                           |
| 8.53     | Gq         | 0.37               | 11.01            | Number of Aromatic Rings                               |
| 8.53     | Gq         | 0.37               | 13               | H attached to alpha-Cd                                 |
| 8.55     | Gq         | 0.26               | 7.73             | O in alcohol                                           |
| 8.55     | Gq         | 0.26               | 7.93             | Number of Hydrogens                                    |
| 8.56     | Antagonist | 0.2                | 6.39             | Number of Bridge Bonds                                 |

| Position | Modus   | Mutual Information | Test Statistic S | Molecular Descriptor                                   |
|----------|---------|--------------------|------------------|--------------------------------------------------------|
| 8.56     | Gq      | 0.27               | 10.04            | N in R--N--R or R--N--X                                |
| 8.56     | Gq      | 0.3                | 11.98            | C in CH2R2                                             |
| Lp2.48   | Gs      | 0.29               | 10.94            | H attached to C0sp3 with one X attached to next carbon |
| Lp2.48   | Gs      | 0.29               | 8.98             | C in R--CX--X                                          |
| Lp2.48   | Gs      | 0.3                | 9.44             | Number of Aromatic Rings                               |
| Lp2.48   | Agonist | 0.29               | 21.81            | Number of Rings                                        |
| Lp2.48   | Gs      | 0.3                | 11.5             | H attached to alpha-Cd                                 |
| Lp2.49   | Agonist | 0.29               | 17.16            | C in CHR3                                              |
| Lp2.49   | Agonist | 0.31               | 10.25            | O in phenol, enol, carboxyl OH                         |
| Lp2.49   | Agonist | 0.31               | 11.93            | ES-Count: sssCH                                        |
| Lp2.49   | Agonist | 0.31               | 16.26            | H attached to heteroatom                               |
| Lp2.49   | Agonist | 0.33               | 13.11            | Molecular Polar Surface Area                           |
| Lp2.49   | Agonist | 0.33               | 21.87            | Number of Rings                                        |
| Lp2.49   | Agonist | 0.28               | 13.23            | Number of Aromatic Rings                               |
| Lp2.49   | Gq      | 0.26               | 6.35             | ES-Count: sssCH                                        |
| Lp2.49   | Gq      | 0.26               | 14.52            | Molecular Polar Surface Area                           |
| Lp2.49   | Gq      | 0.27               | 8.56             | ES-Count: aasC                                         |
| Lp2.49   | Gq      | 0.3                | 9.42             | Number of Atoms                                        |
| Lp2.49   | Gq      | 0.32               | 9.89             | Molecular Surface Area                                 |
| Lp2.49   | Gq      | 0.33               | 18.84            | Number of Aromatic Rings                               |
| Lp2.49   | Gq      | 0.34               | 9.52             | C in CHR3                                              |
| Lp2.49   | Gs      | 0.29               | 16.4             | C in =CHR                                              |
| Lp2.49   | Gs      | 0.29               | 11.05            | Number of Aromatic Rings                               |
| Lp2.49   | Gs      | 0.3                | 17.16            | Number of Hydrogens                                    |
| Lp2.49   | Gs      | 0.32               | 10.84            | Molecular Polar Surface Area                           |
| Lp2.49   | Gs      | 0.33               | 11.9             | Molecular Surface Area                                 |
| Lp2.49   | Gs      | 0.35               | 10.79            | ES-Count: sOH                                          |
| Lp2.49   | Gs      | 0.35               | 11.55            | O in alcohol                                           |
| Lp2.49   | Gs      | 0.37               | 13.42            | Number of Atoms                                        |
| Lp2.49   | Gs      | 0.38               | 9.57             | C in CHR3                                              |
| Lp2.49   | Gs      | 0.39               | 12.41            | Molecular Weight                                       |
| Lp2.49   | Gs      | 0.39               | 11.87            | ES-Count: aasC                                         |
| Lp2.51   | Agonist | 0.32               | 15.13            | O in phenol, enol, carboxyl OH                         |
| Lp2.51   | Agonist | 0.35               | 24.63            | Number of H-Acceptors                                  |
| Lp2.51   | Agonist | 0.42               | 23.3             | O in alcohol                                           |
| Lp2.51   | Agonist | 0.43               | 17.87            | C in CHR3                                              |
| Lp2.51   | Agonist | 0.43               | 17.52            | H attached to heteroatom                               |
| Lp2.51   | Agonist | 0.31               | 23.7             | ES-Count: ssCH2                                        |
| Lp2.51   | Gi      | 0.27               | 12.58            | Number of Atoms                                        |
| Lp2.51   | Gi      | 0.27               | 9.56             | C in CHR2X                                             |
| Lp2.51   | Gi      | 0.27               | 8.9              | Molecular Polar Surface Area                           |
| Lp2.51   | Gq      | 0.3                | 12.31            | Number of Atoms                                        |
| Lp2.51   | Gq      | 0.32               | 10.41            | Molecular Surface Area                                 |
| Lp2.51   | Gq      | 0.35               | 11.47            | ES-Count: aaN                                          |
| Lp2.51   | Gs      | 0.28               | 13.18            | C in CH2R2                                             |
| Lp2.51   | Gs      | 0.29               | 8.92             | ES-Count: ssCH2                                        |
| Lp2.51   | Gs      | 0.29               | 13.34            | Number of Ring Bonds                                   |
| Lp2.51   | Gs      | 0.29               | 10.62            | ES-Count: aaCH                                         |
| Lp2.51   | Gs      | 0.29               | 10.9             | Molecular Surface Area                                 |
| Lp2.51   | Gs      | 0.29               | 10.2             | Number of Hydrogens                                    |
| Lp2.51   | Gs      | 0.29               | 14.23            | ES-Count: dsCH                                         |
| Lp2.51   | Gs      | 0.3                | 12.09            | Number of Atoms                                        |
| Lp2.51   | Gs      | 0.3                | 12.15            | Number of Bonds                                        |

| Position | Modus      | Mutual Information | Test Statistic S | Molecular Descriptor                                   |
|----------|------------|--------------------|------------------|--------------------------------------------------------|
| Lp2.51   | Gs         | 0.35               | 8.72             | Molecular Weight                                       |
| Lp2.51   | Gs         | 0.36               | 11.04            | ES-Count: sssCH                                        |
| Lp2.51   | Gs         | 0.36               | 8.99             | Number of H-Acceptors                                  |
| Lp2.51   | Gs         | 0.36               | 10.17            | C in =CHR                                              |
| Lp2.51   | Gs         | 0.37               | 7.54             | Number of Rings                                        |
| Lp2.51   | Gs         | 0.37               | 9.55             | O in alcohol                                           |
| Lp2.51   | Gs         | 0.37               | 11.12            | H attached to C0sp3 with one X attached to next carbon |
| Lp2.51   | Gs         | 0.38               | 12.18            | ES-Count: sOH                                          |
| Lp2.52   | Antagonist | 0.2                | 25.12            | ES-Count: sOH                                          |
| Lp2.52   | Antagonist | 0.2                | 9.96             | ES-Count: dssC                                         |
